1 **Short Title:** Exploring functional diversity of tobacco aquaporins.

2 **Author for contact:** Annamaria De Rosa ( [annamaria.derosa@anu.edu.au](mailto:annamaria.derosa@anu.edu.au) )

3

## 4 Exploring functional diversity of *Nicotiana tabacum* Aquaporins

5 Annamaria De Rosa<sup>1\*</sup>, John R Evans<sup>1</sup> and Michael Groszmann<sup>1</sup>

6 <sup>1</sup>ARC Centre of Excellence for Translational Photosynthesis, Research School of Biology, Australian National  
7 University, Canberra, ACT 2601, Australia

8 \* For correspondence (email [annamaria.derosa@anu.edu.au](mailto:annamaria.derosa@anu.edu.au))

### 9 Sentence Summary:

10 Diverse tobacco PIP, TIP and NIP aquaporin isoforms were functionally characterised using high-  
11 throughput yeast-based assays, assessing their transport capabilities for key plant solutes: water,  
12 H<sub>2</sub>O<sub>2</sub>, boric acid and urea.

13

### 14 Author Contributions:

15 MG and JRE conceived original research plans; ADR performed yeast screening experiments and  
16 subcellular localisation analyses; ADR and MG performed 3D protein homology modeling analyses;  
17 ADR, JRE and MG analyzed the data and wrote the manuscript. ADR agrees to serve as the author  
18 responsible for contact and ensures communication.

19

### 20 Funding Information:

21 This work was funded by the Australian Government through the Australian Research Council Centre  
22 of Excellence for Translational Photosynthesis (CE140100015).

23

### 24 Abstract

25 Aquaporins (AQPs) are involved in a variety of vital plant physiological processes, including water  
26 relations, development, stress responses and photosynthesis. *Nicotiana tabacum* (tobacco) has 84  
27 AQP genes due to its recent hybridisation and allotetraploid genome. We functionally characterised a  
28 diverse subset of tobacco AQPs spanning the 3 largest AQP subfamilies, selecting nine isoforms from  
29 the PIPs, TIPs, and NIPs. Using high-throughput yeast-based functional assays, we determined AQP  
30 permeability to water, hydrogen peroxide (H<sub>2</sub>O<sub>2</sub>), boric acid (BA) and urea. For each AQP, subcellular  
31 localisations *in planta* were established using GFP translational fusions. From 3D protein homology  
32 modelling, we found that the monomeric pore shape/size, selectivity filter region and NPA motifs is  
33 insufficient to comprehensively predict their transport capabilities. PIPs had the narrowest pore  
34 diameter and were permeable to water, H<sub>2</sub>O<sub>2</sub> and BA. The pore in TIPs was wider and more cylindrical  
35 in shape than for the PIPs. TIP1;1s was permeable to all four substrates tested, and is highly expressed  
36 in leaves and flowers, suggesting it functions in multiple roles. By contrast, NIP5;1t, with a larger pore  
37 size than the NtTIPs, is only expressed in young flowers and enhanced permeability only to BA. Its  
38 homolog in Arabidopsis (*AtNIP5;1*) has the same substrate specificity and functions as a boron  
39 channel.

40

## 41 Introduction

42 Aquaporins (AQPs) constitute a major family of integral membrane channel proteins found across all  
43 kingdoms of life (Abascal et al. 2014), becoming most diversified in number and subfamilies in plants  
44 (Groszmann et al. 2017; Abascal et al. 2014). Plant AQPs play a vital role in diverse physiological  
45 processes, including water relations, growth and development, stress responses, and photosynthesis  
46 (Hachez et al. 2006; Groszmann et al. 2017; Chaumont and Tyerman 2017). This range in cellular  
47 functions reflects a capability for transporting a wide variety of substrates including water, nitrogen  
48 compounds (e.g. ammonia, urea and nitrate), gases (e.g. carbon dioxide, oxygen), hydrogen peroxide,  
49 metalloids (e.g. boron, silicon), and ions (Gomes et al. 2009; Pommerrenig et al. 2015; Hove and Bhav  
50 2011; Choi and Roberts 2007; Zwiazek et al. 2017; Byrt et al. 2017; Bienert et al. 2013; Liu et al. 2020).  
51 However, functional characterisation of AQPs is quite limited. Elucidating substrate transport profiles  
52 of AQPs is a key component for understanding their potential roles in plants and for enabling their use  
53 in crop improvement.

54 Aquaporins assemble as tetrameric complexes, with each monomer forming a functional pore created  
55 by six membrane spanning helices, five connecting loops and two shorter helices. At the centre of the  
56 AQP tetramer there is a fifth central and functioning pore (Pommerrenig et al. 2015; Kirscht et al.  
57 2016; Törnroth-Horsefield et al. 2006). Although the gross tertiary structure of AQP is highly conserved  
58 across organisms, slight deviations in structural and functional characteristics between isoforms  
59 contribute to differences in their transport selectivity. Such characteristics include pore dimensions  
60 (pore diameter and overall morphology), chemical properties and flexibilities of pore-lining residues,  
61 and specific configurations of residues at key constriction points (Luang and Hrmova 2017). Higher  
62 plant AQPs divide into five phylogenetically distinct sub-families, namely the Plasma membrane  
63 Intrinsic Proteins (PIPs), Tonoplast Intrinsic Proteins (TIPs), Small basic Intrinsic Proteins (SIPs), Nodulin  
64 26-like Intrinsic Proteins (NIPs), and X Intrinsic Proteins (XIPs) (Danielson and Johanson 2008; Johanson  
65 and Gustavsson 2002; Kaldenhoff and Fischer 2006). Within each of these sub-families, there can be  
66 diversity in permeating substrate selectivity and specific organelle membrane integration (Maurel et  
67 al. 2008). Subfamily-specific substrate specificities in plant AQPs have been attributed to diversity in  
68 the aromatic arginine (ar/R) selectivity filter (SF) which forms the first constriction site towards the  
69 extracellular side of the pore (Hove and Bhav 2011). Variation in this site largely determines the  
70 substrates able to permeate across the membrane through the AQP (Hove and Bhav 2011; Sui et al.  
71 2001). Dual Asn-Pro-Ala (NPA) motifs located at the centre of the pore act as a second constriction,  
72 with variation in residue composition contributing to selectivity for substrates such as ammonia, boric  
73 acid (BA) and urea (Wu and Beitz 2007; Hove and Bhav 2011).

74 *Nicotiana tabacum* (tobacco) arose from a recent hybridization and its allotetraploid genome contains  
75 84 AQP genes (De Rosa et al. 2020; Ahmed et al. 2020; Groszmann et al. 2021). The multiplicity of AQP  
76 gene isoforms and relatedness to horticulturally important crops such as tomato, potato, eggplant  
77 and capsicum, makes tobacco a favourable study species for translating key findings into crops (De  
78 Rosa et al. 2020).

79 Teasing apart the complexities of aquaporin biology *in planta* can be difficult. Plants have many AQP  
80 isoforms, with some having redundancy of function under certain environmental conditions (Abascal  
81 et al. 2014; Fox et al. 2017). As such, modification of aquaporin expression within the plant, via over  
82 expression or down regulation of a specific AQP, may also affect the expression of closely related  
83 isoforms (Bi et al. 2015; Kaldenhoff et al. 2007). Functional characterisation of plant AQPs is often  
84 accomplished through heterologous expression systems, such as yeast (Kaldenhoff et al. 2007),  
85 allowing for assignment of substrate specificity to an AQP homo-tetramer in isolation from other  
86 isoforms and other confounding external regulatory mechanisms. We developed a high-throughput  
87 micro-cultivation-based yeast assay to study AQP function and used it to develop substrate profiles

88 for the entire Arabidopsis PIP family (Groszmann et al. in preparation). Here we extend the application  
89 of this platform to screen a diverse subset of tobacco AQPs spanning the 3 largest AQP subfamilies  
90 (PIPs, TIPs and NIPs). These AQPs isoforms were chosen based on homology to already characterised  
91 AQPs in other species or on gene expression characteristics within the plant which might implicate  
92 diverse functional roles. Three PIP1 genes were chosen: *NtPIP1;5s* (NtAQP1), *NtPIP1;1t* and *NtPIP1;3t*,  
93 each sharing more than 90% homology in gene sequence. *NtPIP1;5s* (NtAQP1) is an established CO<sub>2</sub>-  
94 permeable AQP isoform, that enhanced CO<sub>2</sub> diffusion and photosynthetic efficiency *in planta* (Uehlein  
95 et al. 2003; Flexas et al. 2006). Here we assessed permeability to water, H<sub>2</sub>O<sub>2</sub>, BA and urea, but not  
96 CO<sub>2</sub>. Two PIP2 genes, *NtPIP2;4s* and *NtPIP2;5t*, were chosen as representative isoforms from distinct  
97 phylogenetic sub-clades within the PIP2 phylogeny. From the TIPs, *NtTIP1;1s* was chosen as a gene  
98 highly expressed throughout the plant (De Rosa et al. 2020) and potentially permeable to range of  
99 solutes, while *NtTIP2;5t*, a TIP predominantly expressed in roots (De Rosa et al. 2020), had high  
100 homology to *AtTIP2;1*, an established transporter of nitrogen compounds (urea and ammonium)  
101 (Loqué et al. 2005; Liu et al. 2003). Representative isoforms from two distinct subclasses within the  
102 NIP subfamily were selected. *NtNIP5;1s* belongs to the NIP II class and is homologous to the boron-  
103 permeable *AtNIP5;1* (Takano et al. 2006; Pommerrenig et al. 2015). *NtNIP2;1s* belongs to a distinct  
104 class of NIPs (NIP III), which transports a diverse range of metalloids including the  
105 important micronutrients boron and silicon.

106 We used our high-throughput yeast-based functional system to test for water, hydrogen peroxide  
107 (H<sub>2</sub>O<sub>2</sub>), BA and urea permeability. Subcellular localisation of each AQP was visualised *in planta* with an  
108 Arabidopsis expression system. Substrate permeability and sub-cellular localisation data were  
109 collated with gene expression data and 3D homology modelling to characterise these tobacco AQPs.

110

## 111 Results

### 112 Tobacco Aquaporin localisation in Yeast

113 Nine diverse NtAQP isoforms, from the PIP, NIP and TIP sub-families (Figure 1) were functionally  
114 characterised. N-terminal GFP-AQP fusions were used to establish whether NtAQP proteins integrated  
115 into the plasma membrane (PM) of yeast (Figure 2A-I), a necessary condition for attributing AQP-  
116 facilitated diffusion into the cell. Optically thin focal plane images of each yeast construct show the  
117 localisation of the GFP signal. These images were further processed using surface profiling and line  
118 scans of signal intensity to better assess the distribution of GFP-AQP within the yeast cells. Yeast  
119 expressing GFP alone (Figure 2J), showed a uniform signal throughout the cell with the exception of  
120 the vacuole. The surface and line signal scans show a relatively equal distribution of intensity,  
121 consistent with cytosolic localisation. The fusion of NtAQPs to GFP resulted in the redistribution of  
122 GFP fluorescence to different yeast sub-cellular compartments including; PM, endoplasmic reticulum  
123 (ER), and/or the tonoplast (vacuolar membrane). The GFP-NtPIP1 fusions localised to the periphery  
124 of the cell and the ER. Although signal intensity in the periphery varied, likely due to co-localisation in  
125 peripheral ER, the signal remained continuous around the cell, consistent with PM integration (Figure  
126 2 A-C). In addition to localisation in the yeast PM, images for NtPIP1;5s frequently contained bright  
127 spots in the periphery of the cell which are characteristic of ER localisation (Figure 2C). The NtPIP2  
128 proteins integrated into the PM, with clearly defined peaks present in the line scans, but GFP signal  
129 also localised to the ER and faintly inside the vacuole (Figure 2E-D). NtNIP2;1s localised to the PM and  
130 ER, similar to that observed for the NtPIP1s (Figure 2F). NtNIP5;1 weakly localised to the PM and ER,  
131 with signal predominantly associated with integration into the tonoplast (Figure 2G). The NtTIPs had  
132 strong signals distributed between the ER, tonoplast and notably the PM (Figure 2H-I). We confirmed  
133 PM integration for all NtAQP constructs tested.

134

135 **Water permeability “Freeze-thaw” assay**

136 Growth curves of *aqy1 aqy2* yeast expressing the Empty vector did not survive exposure to two freeze-  
137 thaw cycles, failing to grow after treatments (Figure 3A). By contrast, the growth *aqy1 aqy2* yeast  
138 expressing *NtPIP2;4s* subjected to two freeze-thaw cycles was only slightly delayed compared to  
139 untreated yeast (Figure 3B). Substantial differences in growth were observed between treated and  
140 untreated yeast expressing either a particular NtAQP or empty vector (Figure 3C). Following exposure  
141 to two freeze-thaw cycles, the *aqy1 aqy2* yeast expressing the empty vector had only 2% growth  
142 relative to the untreated empty vector culture (Figure 3C). *NtPIP2;4s* and *NtPIP2;5t* expression  
143 resulted in the greatest yeast growth following the freeze-thaw treatments, achieving 70% of the  
144 untreated growth (Figure 3C). *NtTIP1;1s* and *NtTIP2;5t* grew 62% and 30%, respectively, relative to  
145 untreated controls. Thus, four out of the nine NtAQPs tested were able to increase the permeability  
146 of the PM to water sufficiently to allow the yeast to survive two freeze-thaw treatments.

147

148 **H<sub>2</sub>O<sub>2</sub> toxicity assay**

149 Dose-dependent differences upon exposure to increasing H<sub>2</sub>O<sub>2</sub> treatments were observed in growth  
150 curves of yeast expressing the empty vector (Figure 4A) or a “H<sub>2</sub>O<sub>2</sub>-permeable” AQP (Figure 4B). Yeast  
151 expressing the empty vector and exposed to 0.25mM or 0.5mM H<sub>2</sub>O<sub>2</sub> treatments, had no significant  
152 reduction on growth relative to untreated yeast, while 1mM H<sub>2</sub>O<sub>2</sub> treatment caused a 37% decrease  
153 in growth relative to the untreated control (Figure 4C). By contrast, growth was dramatically reduced  
154 in the presence of 0.25mM H<sub>2</sub>O<sub>2</sub> for yeast expressing *NtPIP2;4s* (growth reductions were 66%, 86%  
155 and 80% at 0.25mM, 0.5mM and 1mM H<sub>2</sub>O<sub>2</sub>, respectively, Figure 4C). Five NtAQPs increased yeast  
156 sensitivity to H<sub>2</sub>O<sub>2</sub> exposure compared to empty vector, consistent with these AQPs being classified as  
157 H<sub>2</sub>O<sub>2</sub> permeable: *NtPIP2;4s*, *NtPIP2;5t*, *NtPIP1;1t*, *NtTIP1;1s* and *NtNIP2;1s*. The lowest concentration  
158 of H<sub>2</sub>O<sub>2</sub> that resulted in a significant reduction in growth compared to untreated was 0.25mM for  
159 *NtPIP2;4s* and *NtPIP2;5t* and 0.5mM for *NtPIP1;1t*, *NtNIP2;1s* and *NtTIP1;1s*.

160

161 **Boric acid toxicity assay**

162 Yeast expressing the empty vector (Figure 5A) or a “BA-permeable” AQP (Figure 5B) showed reduced  
163 growth in the presence of BA. Exposure of yeast expressing the empty vector control to 10mM BA did  
164 not impair growth (Figure 5A and 5C). However, greater BA concentrations progressively reduced  
165 growth (by 33% and 64% at 20 and 30mM BA, respectively). Three phenotypes were observed across  
166 NtAQP-expressing yeast exposed to 20mM and 30mM BA concentrations. The first phenotype  
167 displayed a 20-30% reduction in growth relative to the empty vector yeast (*NtTIP1;1s* and *NtTIP2;5t*,  
168 Figure 5C), consistent with these AQPs being classified as BA-permeable, enhancing a toxicity  
169 response. The second phenotype had a BA toxicity response that was within 10-20% of the empty  
170 vector (*NtNIP2;1s*, *NtNIP5;1t* and *NtPIP1;5s*, Figure 5C). Yeast expressing *NtNIP2;1s* had a significant  
171 reduction in growth at 10mM or 20mM BA (p<0.05), suggesting moderate sensitivity to BA exposure.  
172 The third phenotype, observed in 4 of the 5 PIP-expressing yeasts (*NtPIP1;1t*, *NtPIP1;3t*, *NtPIP2;4s*,  
173 *NtPIP2;5t*), resulted in a greater tolerance to BA exposure (average growth 20% greater than empty  
174 vector at 20mM and 30mM BA, Figure 5C). The reduced toxicity response associated with expressing  
175 any of these 4 NtPIPs could result from increased protein abundance in the PM reducing space  
176 available for free membrane diffusion of BA across the PM, thereby decreasing cell permeability to  
177 BA. Therefore, although *NtPIP1;5s* did not have a drastic decline in growth compared to the Empty  
178 vector control, growth was significantly reduced (~25% at 20mM BA) compared to yeast expressing  
179 the other PIPs, likely due to boron permeability.

180

## 181 Urea growth-based assay

182 Permeability of AQPs to urea was assessed by enhanced growth phenotypes. For *ynvwl* yeast, 12mM  
183 urea provided sufficient nitrogen for yeast cultures to reach a growth curve plateau within a ~50 hour  
184 incubation (Figure 6A-B, black lines). Growth curves of yeast expressing the empty vector (Figure 6A)  
185 or a “urea-permeable” AQP (Figure 6B) show that the expression of the latter enhanced yeast growth  
186 at low urea concentrations (2mM and 4mM urea). Yeast expressing the empty vector exhibited a linear  
187 growth response to increasing urea concentrations (Figure 6C). Expression of *NtTIP1;1s*, *NtNIP2;1s* or  
188 *NtTIP2;5t* resulted in a 50% growth enhancement at both 2mM and 4mM urea compared to yeast  
189 expressing an empty vector (Figure 6C). Growth responses for the other 6 NtAQPs (*NtPIP1;1t*,  
190 *NtPIP1;5s*, *NtPIP1;3t*, *NtPIP2;4s*, *NtPIP2;5t*, *NtNIP5;1t*), were similar to the yeast expressing the empty  
191 vector and these AQPs are presumed not permeable to urea.

192

## 193 *In planta* sub-cellular localisation of tobacco AQPs

194 Confocal images of root cortical cells from Arabidopsis plants expressing GFP-NtAQP constructs were  
195 obtained (Figure 7). To enhance interpretation, surface plots of a region of GFP intensity near the cell  
196 wall are shown at greater magnification (indicated by white dashed box). Organelle-specific marker  
197 lines for the plasma membrane, ER and tonoplast are shown in magenta (Figure 7A-C). We observed  
198 diversity in AQP membrane integration across the PIP, TIP and NIP subfamilies. The PIPs localised to  
199 the PM, with the PIP1s (*PIP1;1t*, *PIP1;3t* and *PIP1;5s*) appearing to have a weaker and more diffuse PM  
200 integration when compared to the PIP2s (*PIP2;4s* and *PIP2;5t*) which had a sharp and defined GFP  
201 signal around the cell’s periphery (Figure 7D-H). The NtNIPs (*NIP2;1s* and *NIP5;1t*) also localised to the  
202 cell’s periphery. However, their GFP signal was speckled in appearance with distinct localised spots of  
203 brighter fluorescence which are characteristic of ER localisation (indicated by white arrow on *NIP2;1s*  
204 surface plot profile of GFP intensity, Figure 7I-J). There was also a wider spread in GFP signal, arising  
205 from adjacent PM and ER. The localisation of NtTIPs (*TIP1;1s* and *TIP2;5t*) was consistent with  
206 integration in the tonoplast, showing a uniform yet diffuse localisation with a wavy topology; also  
207 denoted by the presence of internal membranes resembling transvacuolar strands (V, Figure 7K-L).

208

## 209 Protein modelling of aquaporin pores

210 Tertiary structure homology modelling was used to compare pore diameter and the physico-chemical  
211 properties between the 9 NtAQPs functionally characterised in this study. We made pair-wise  
212 comparisons between homology models based on the SoPIP2;1 (open; PDB: 2b5f.1.A) and AtTIP2;1  
213 (PDB:5i32.1.A) crystal structure templates to ascertain the most appropriate (see Supplemental  
214 Methods S1).

215 Pore diameter profiles and physico-chemical characteristics of the NtAQPs across the different  
216 subfamilies were compared using the highest-confidence 3D homology models (Figure 8-9). All 5 pore  
217 diameter profiles for the NtPIPs closely overlapped (blue line, Figure 8A), with the SF region being the  
218 narrowest point along the pore (diameter of 2.4Å). The SF residue composition of the NtPIPs was  
219 conserved, having Phe-His-Thr-Arg composition in Helix 2 (H2), Helix 5 (H5), Loop E position 1 (LE1)  
220 and Loop E position 2 (LE2), respectively. The TIPs also have a conserved pore diameter profile, with  
221 the SF region being the narrowest point (dark and light purple lines, Figure 8A). However, the pore  
222 shape of the NtTIPs was less undulating in comparison to the PIPs, with the SF region being wider (2.75  
223 Å diameter) and the NPA region being slightly narrower (4.26 Å diameter in TIPs vs. the 4.48 Å of the  
224 PIPs; Figure S1 A, B). The SF residue composition differed between the 2 NtTIPs; with *NtTIP1;1s* having  
225 His- Ile- **Ala- Val** vs. *NtTIP2;5t* having His-Ile-**Gly-Arg** at H2-H5-LE1-LE2 positions (Figure 8C). The NtNIPs  
226 that we characterised showed some variation in pore diameter profiles; with *NtNIP2;1s* having a SF  
227 diameter ranging from **3.5-4 Å**, vs. *NtNIP5;1t*’s SF diameter of **2.6-3.5 Å** (Figure 8A). The remainder of  
228 the pore toward the cytosolic side was similar in profile between these two genes. The differences in

229 SF pore diameter between the NtNIPs were matched with variation in residue composition in this  
230 region, with NtNIP2;1s having SF residues: **Gly-Ser-Gly-Arg** and NtNIP5;1t: **Ala-Ile-Ala-Arg** at H2-H5-  
231 LE1-LE2 positions respectively. The small size of the residues at the H2 and H5 position (Ser and Gly,  
232 respectively) in NtNIP2;1s, contribute to the larger pore diameter at this constriction site (Figure 8Civ).  
233 The composition of the NPA motifs (NPA1 and NPA2) is conserved across all of the NtPIPs, NtTIPs and  
234 NtNIP2;1s, with the exception of NtNIP5;1t which has NPS at NPA1 and NPV at NPA2 (Figure 8D).

235 We also characterised physico-chemical properties of the NtAQP pores (Figure 9). The NtPIPs have  
236 high homology in residue hydrophobicity and flexibility (Figure 9D). For both PIP1s and PIP2s,  
237 conserved regions around the cytosolic pore mouth and the narrowest part of the pore (the SF region)  
238 are lined with hydrophilic residues, whereas the remainder of the pore is lined with hydrophobic  
239 residues. The flexibility of the PIPs' pore lining residues was also conserved with a band of low-  
240 flexibility residues in their SF constriction region while the remainder of the pore having medium-high  
241 flexibility residues (Figure 9D). The pore profiles for NtTIPs were nearly cylindrical without the  
242 hourglass shape at the selectivity filter, being lined with mostly hydrophobic and less flexible residues  
243 (Figure 9B). Variation in flexibility was observed between the 2 NtNIPs, with pore lining residues in  
244 NtNIP5;1t being more flexible at the SF than in NtNIP2;1 (Figure 9C). The apoplastic pore entrance of  
245 NtNIP2;1 was very flexible and more hydrophilic than NtNIP5;1t (Figure 9C). All the NIPs and TIPs had  
246 low flexibility at the NPA central bottleneck region.

247

## 248 Discussion

### 249 NtAQP integration into the plasma membrane of yeast cells

250 A fundamental assumption in permeability assays is that the expressed AQP is present in the plasma  
251 membrane. We established this by using GFP translational fusions to visualise NtAQP subcellular  
252 localisation for each construct in yeast. Having confirmed that all AQP isoforms integrated into the PM  
253 in yeast (Figure 2), we could then infer that alterations to the growth of yeast upon exposure to specific  
254 substrates were due to AQP-related changes in PM permeability (Bienert and Chaumont 2014).  
255 Although we detected fluorescence consistent with incorporation of GFP tagged NtPIP1s in the PM of  
256 yeast (Fig. 2), there are several cases where PIP1 permeability to water has only been observed when  
257 PIP1 was co-expressed with a PIP2 (*Xenopus* oocytes, (Fetter et al. 2004), Yeast, (Groszmann et al. in  
258 preparation), reviewed in (Groszmann et al. 2017)). In future work, it would be useful to assess  
259 whether co-expression of PIP1s with PIP2s maximises detection of permeability to water or other  
260 substrates. Observing both GFP fluorescence consistent with localisation in the PM together with a  
261 positive increase in apparent permeability for one substrate enabled us to assign a 'non-permeable'  
262 result for other substrates for a given AQP. We therefore propose that confirmation of PM integration  
263 should be a necessary checkpoint when functionally testing AQPs in heterologous expression systems.

264

### 265 Relating functional characterisation, sub-cellular localisation, and gene 266 expression of NtAQPs

267 Having established that the expressed NtAQP were incorporated into the yeast PM, we present the  
268 combined permeability results, *in planta* sub-cellular localisation in Arabidopsis root cortical cells,  
269 gene expression localisation and protein modelling results in Table 1. The NtAQP data are placed in  
270 context with multiple permeabilities published for other AQPs. *In planta* subcellular localisation of the  
271 NtAQPs was consistent with their respective AQP subfamilies.

272

## 273 NtPIPs

274 The PIP subfamily in plants generally has the largest number of isoforms (Anderberg et al. 2012). They  
275 are involved in plant water homeostasis through highly selective water transport activity, as well as  
276 facilitating diffusion of other small molecules such as glycerol, urea, BA, arsenous acid, H<sub>2</sub>O<sub>2</sub>, gases  
277 and ions (Bienert et al. 2018; Liu et al. 2020). Certain isoforms enhance permeability to multiple  
278 molecules e.g. AtPIP2;1 permeable to water, H<sub>2</sub>O<sub>2</sub>, CO<sub>2</sub> and cations, with functionality dictated by its  
279 location within the plant, interacting proteins and associated post-translational modifications  
280 (Tyerman et al. 2021).

281 Both NtPIP2s tested were permeable to water and H<sub>2</sub>O<sub>2</sub>, with NtPIP2;4s seemingly more efficient at  
282 transporting H<sub>2</sub>O<sub>2</sub> than PIP2;5t. H<sub>2</sub>O<sub>2</sub> permeability was predicted for these two PIP2s by Ahmed et al.  
283 (2020) based on substrate specific signature sequences (Azad et al. 2016) (see (Groszmann et al. 2021)  
284 to convert between equivalent NtAQP gene names). None of the three NtPIP1s examined here  
285 enhanced permeability to water, but were permeable to H<sub>2</sub>O<sub>2</sub> (NtPIP1;1t) or BA (NtPIP1;5s) (Table 1).  
286 As permeability to H<sub>2</sub>O<sub>2</sub> and BA was not predicted for these PIP1s by Ahmed et al. (2020), subtle  
287 sequence differences or pore dynamics of these isoforms clearly can modify an AQP's preferential  
288 transport to a given substrate (Qiu et al. 2020). Various PIP1 and 2 isoforms from other species are  
289 permeable to BA (e.g. ZmPIP1;1 (Dordas et al. 2000), VvPIP1;4 and VvPIP2;3 (Sabir et al. 2014),  
290 HvPIP1;3 and 1;4 (Fitzpatrick and Reid 2009), OsPIP2;4 and 2;7 (Kumar et al. 2014)). NtPIP1;5s has  
291 been reported to have a low permeability to H<sub>2</sub>O<sub>2</sub> using a fluorescence dye-based assay (Navarro-  
292 RóDenas et al. 2015), but as we could not detect permeability to H<sub>2</sub>O<sub>2</sub>, this needs to be confirmed  
293 using co-expression of both PIP1 and PIP2.

294 Combining substrate permeabilities with *in planta* subcellular localisation and tissue specific  
295 expression analysis helps elucidate possible physiological roles for these NtAQPs. The results implicate  
296 *NtPIP2;4s* and *NtPIP2;5t* having roles in regulating water transport across cell membranes in roots and  
297 leaves, respectively. Three of the NtPIPs tested here were permeable to H<sub>2</sub>O<sub>2</sub>, so are likely to be  
298 involved with ROS signalling in response to stress (Hachez et al. 2006) by facilitating H<sub>2</sub>O<sub>2</sub> diffusion  
299 between cells. *NtPIP1;5s* (NtAQP1) was the first plant AQP shown to permeate CO<sub>2</sub> (Uehlein et al.  
300 2003), facilitating diffusion of CO<sub>2</sub> into the chloroplast during photosynthesis (Flexas et al. 2006). We  
301 suggest *NtPIP1;5s* might have an additional role in boron uptake and distribution throughout the plant  
302 (expressed in roots, stems, leaves and flowers), similar to the functional roles reported for other  
303 boron-permeable PIPs, HvPIP1;3 and HvPIP1;4 (Fitzpatrick and Reid 2009) and OsPIP2;4 and OsPIP2;7  
304 (Kumar et al. 2014). The boron-transport capability of the PIPs, and their narrow inflexible pore  
305 constriction site (2.4Å SF size vs. 5.14 Å size of BA) suggests that permeability of this substrate could  
306 potentially occur through the tetrameric central pore.

307

## 308 NtTIPs

309 The TIP subfamily regulates the diffusion of water, ammonia, urea and metalloids across the tonoplast  
310 (Maurel et al. 1993; Loqué et al. 2005; Liu et al. 2003). Five specialised TIP subgroups have evolved in  
311 higher plants (TIP1-TIP5), differing in ar/R filter (SF) composition and substrate specificities (Anderberg  
312 et al. 2012; Kirscht et al. 2016). Exemplars from both TIP1 (*NtTIP1;1s*) and TIP2 (*NtTIP2;5t*) subgroups  
313 localised to the tonoplast *in planta*, where they could increase permeability to water, BA and urea.  
314 *NtTIP1;1s* was also moderately permeable to H<sub>2</sub>O<sub>2</sub> but *NtTIP2;5t* was not. The substrate permeabilities  
315 observed here for *NtTIP1;1s* exactly match those for *ZmTIP1;1* (Fox et al. 2017).

316 The SF region of the NtTIPs was found to be wider than that of the NtPIPs. An extended selectivity  
317 filter has been characterised for the TIP subfamily, containing an additional contact residue in Loop C  
318 of the AQP monomer (Kirscht et al. 2016), with *NtTIP1;1s* and *NtTIP2;5t* having a Phe and His at this  
319 position, respectively (De Rosa et al. 2020). The *NtTIP1;1* SF composition of a Phe in Loop C and a Val  
320 in Loop E2 creates a more hydrophobic environment in the SF compared to that of *NtTIP2;5s* which

321 has His and Arg in the same two positions respectively. This results in TIP1;1s being more hydrophobic  
322 than TIP2;5t in its constriction region (Figure 9B). While Ahmed *et al.* (2020) correctly predicted TIP1;1s  
323 should be permeable to H<sub>2</sub>O<sub>2</sub> and urea, our results did not match their prediction for TIP2;5t for H<sub>2</sub>O<sub>2</sub>  
324 and ammonia. Instead we found TIP2;5t was permeable to urea, but not H<sub>2</sub>O<sub>2</sub>. The differences in SF  
325 composition and hydrophobicity between NtTIP1;1s and NtTIP2;5t might explain their divergences in  
326 in permeability to H<sub>2</sub>O<sub>2</sub> (Table 1) and potentially also ammonia (Kirscht *et al.* 2016). *NtTIP1;1s* is  
327 expressed in leaves and flowers whereas *NtTIP2;5t* is predominantly expressed in the roots (having  
328 low expression in leaves and flowers). Root-specific gene expression of *TIP2* isoforms was also  
329 observed in closely related gene ortholog, tomato *TIP2;5* (De Rosa *et al.* 2020) and more distantly  
330 related maize *TIP2s* (Fox *et al.* 2017), indicating potential conservation of function of TIP2s across  
331 closely related and diverse species. The proposed functional roles for NtTIP1;1s and NtTIP2;5t include  
332 the loading and unloading of urea from vacuolar storage, the storage and translocation of boron, and  
333 equilibration of water in tissues where they are expressed (Maurel *et al.* 2015). Furthermore,  
334 NtTIP1;1s could also be involved in ROS signalling in response to stress, as it has been suggested that  
335 TIPs are involved in cellular detoxification of H<sub>2</sub>O<sub>2</sub> (Bienert and Chaumont 2014).

336

### 337 NtNIPs

338 NIP aquaporins are known to facilitate the transport of small uncharged solutes, such as glycerol, urea  
339 and metalloids (Wallace *et al.* 2006). NIPs have a more hydrophobic ar/R selectivity filter, which  
340 reduces water permeability in favour of other substrates such as ammonia, urea and metalloids (Wu  
341 and Beitz 2007; Hove and Bhawe 2011). There are three sub-classes (NIP I-III), based on ar/R selectivity  
342 filter and NPA motif composition (Mitani *et al.* 2008). A representative from each of NIP II (*NtNIP5;1t*)  
343 and NIP III (*NtNIP2;1s*) sub-classes were characterised here. GFP tagging demonstrated that both  
344 NIP2;1s and NIP5;1s were incorporated into the PM as well as accumulating in the ER *in planta*. The  
345 integration in the plant cell PM (versus tonoplast localisation of the TIPs) implies transport of solutes  
346 in and out of cells, rather than simply storage/translocation from the vacuole.

347 NIP II aquaporins tend to have a larger pore diameter than those found in the NIP I sub class, having  
348 a substitution of the highly conserved and bulky Trp at the ar/R H2 position for a smaller Ala (Wallace  
349 and Roberts 2004). *NtNIP5;1t* had a wider pore diameter compared to that of the tobacco PIP and TIP  
350 isoforms (Figure 8). NIP II aquaporins have been shown to permeate BA, glycerol and urea, together  
351 with reduced water permeability compared to the NIP Is (Wallace *et al.* 2006; Takano *et al.* 2006;  
352 Hanaoka *et al.* 2014; Tanaka *et al.* 2008). By contrast, while *NtNIP5;1t* enhanced permeability to BA,  
353 it did not enhance permeability to urea despite their similar size (Table 1) *NtNIP5;1t* expression is  
354 highly targeted to young flowers and could be involved in boron redistribution during flower  
355 development, similar to the orthologous gene in Arabidopsis (*AtNIP5;1*), which has an established role  
356 in boron transport and flower development (Takano *et al.* 2006). Notably, expression of NIP II  
357 isoforms, *AtNIP5;1* (in flowers) and *AtNIP6;1* (in basal shoot), is induced in boron-limiting conditions  
358 (Takano *et al.* 2006; Tanaka *et al.* 2008). The variation in expression patterns (localisation and stress-  
359 responsiveness) reported for PIPs vs. NIP IIs, allude to differences in physiological relevance of their  
360 boron transport *in planta*. PIPs could mediate a broad boron uptake and distribution (Fitzpatrick and  
361 Reid 2009), however their co-function as water channels subjects them to tight regulation (Chaumont  
362 and Tyerman 2014). Boron-permeable PIPs would also provide tolerance to boron toxicity by enabling  
363 efflux of excess boron from roots and shoots (Kumar *et al.* 2014; Kumar *et al.* 2018). Unlike the PIPs,  
364 water-tight NIP IIs enable highly targeted boron transport in boron-limiting conditions, and are down-  
365 regulated in boron sufficient concentrations (Takano *et al.* 2006; Chaumont and Tyerman 2017).

366 NIP III aquaporins (such as *NtNIP2;1s*) are characterised by an ar/R filter composed of smaller residues  
367 (Gly-Ser-Gly-Arg), resulting in an even wider, flexible and more hydrophilic SF (Bansal and  
368 Sankaramakrishnan 2007; Mitani-Ueno *et al.* 2011). Our 3D homology modelling showed that  
369 NtNIP2;1s indeed has a wider pore than all the other NtAQP isoforms characterised (Figure 8),



370 consistent with this sub-class being permeable to larger substrates, such as silicic acid (4.38 Å  
371 diameter) and lactic acid (Mitani-Ueno et al. 2011). Unlike NIP5;1t, NIP2;1s was permeable to multiple  
372 substrates, urea, BA and H<sub>2</sub>O<sub>2</sub> (low), implicating this NIP isoform in multiple functional roles.

373 NIP III isoforms occur widely among Graminae, but are not found in all dicots (e.g. absent in  
374 Arabidopsis), with evidence suggesting their principal role as facilitators of silicon uptake in plants  
375 (Chaumont and Tyerman 2017). In addition to silicon, *ZmNIP2;1* (NIP III) is also permeable to water,  
376 urea, BA and H<sub>2</sub>O<sub>2</sub> (low) (Fox et al. 2017), suggesting some functional homology in the maize and  
377 tobacco isoforms. Expression of *NtNIP2;1* is restricted to young flowers where it is likely to be involved  
378 in strategic translocation of small molecules in this target tissue.

379

## 380 Conclusions

381 This study characterised a diverse set of isoforms in the tobacco AQP family assessing permeability to  
382 key solutes for plant growth: water, H<sub>2</sub>O<sub>2</sub>, urea and boric acid. The functional diversity observed  
383 between the NtAQP isoforms highlights complexity in assigning *in planta* function to specific isoforms,  
384 with monomeric pore shape/size, SF and NPA motifs alone insufficient to comprehensively predict  
385 their transport capabilities.

386 We observed permeability to each of the substrates tested across three largest AQP subfamilies, with  
387 substrate selectivity ranging from none to all substrates tested, indicative of specific or broad  
388 functional roles. By using isoforms with sequence homology to well characterised AQPs from other  
389 species (*NtTIP2;5t* to *AtTIP2;1* and *NtNIP5;1t* to *AtNIP5;1*), we could correlate sequence similarity to  
390 functional homology, as well as identify novel permeating substrates to extend their transport profiles.

391 We propose that testing transport capability to several substrates could be used to assign *in planta*  
392 roles to multifunctional aquaporins.

393

394

## 395 Methods

### 396 Generation of NtAQP phylogeny

397 MUSCLE-aligned nucleotide sequences identified in De Rosa et al. 2020 and Ahmed et al. 2020,  
398 (consensus NtAQP family in (Groszmann et al. 2021)), were used to construct a phylogenetic tree  
399 using neighbour-joining method (pair-wise deletion; bootstrap=1000) in MEGA7 software (Kumar et  
400 al. 2016).

### 401 Generation of NtAQP expression constructs and transformation into yeast

402 Native sequences of *NtAQPs* sequences, *NtPIP1;1t* (BK011393), *NtPIP1;3t* (BK011396), *NtPIP1;5s*  
403 (BK011398), *NtPIP2;4s* (BK011406), *NtPIP2;5t* (BK011409), *NtTIP1;1s* (BK011426), *NtTIP2;5t*  
404 (BK011440), *NtNIP2;1s* (BK011379), *NtNIP5;1t* (BK011387) were commercially synthesised in  
405 Gateway-enabled destination vectors. Entry vectors were cloned into three destination vectors from  
406 (Alberti et al. 2007): pRS423-GPD with a Histidine3 (HIS3) marker gene for yeast selection, and  
407 pRS423-GPD-ccdB-ECFP and pRS426-GPD-eGFP-ccdB both containing Uracil3 (URA3) yeast selection  
408 gene. Yeast expression vectors were transformed in respective yeast strains required for functional  
409 assays (described below), using the “Frozen-EZ yeast Transformation Kit II” (Zymo Research, Los  
410 Angeles, USA). Transformed colonies were grown in Yeast Nitrogen Base, YNB, media (Standard drop  
411 out, DO, -URA or -HIS) and spotted on agar YNB (DO -URA or -HIS) selection plates for incubation at  
412 30°C for 2 days, then stored at 4°C. Spotted plates were used for the starting cultures of functional  
413 assays.

#### 414 **Confirming plasma membrane integration of NtAQPs in yeast cells**

415 We assessed NtAQP subcellular localisations in yeast cells with AQP-GFP translational fusions to  
416 confirm incorporation of the expressed AQP in the yeast plasma membrane (PM). Tobacco AQP:GFP  
417 translational fusions were generated via gateway cloning of pUC57 entry vectors with NtAQP coding  
418 sequences into pRS426-GPD-EGFP-ccdB yeast expression vector (Alberti et al. 2007); producing N-  
419 terminal GFP::NtAQP fusion proteins driven by the constitutive GPD promoter. The GFP-only yeast  
420 expression was obtained using the empty vector (no GOI fusion), with eGFP alone constitutively  
421 expressed via the GPD promoter. Yeast was grown overnight in 2mL YNB (-URA) (OD<sub>600</sub> 1-1.5). 1mL  
422 aliquots of overnight cultures were sub-cultured and grown 3-4 hours in 2mL of fresh YNB (-URA)  
423 media, to ensure imaging of newly formed cells. Yeast (10µL) was mounted on a polysine slide with a  
424 coverslip sealed with nail polish. Yeast cells were visualised with a Zeiss LSM 780 Confocal microscope  
425 using a 40x oil immersion objective (1.2 NA). Light micrographs of yeast cells were acquired using  
426 Differential Interference Contrast (DIC), with GFP fluorescence captured using excitation at 488 nm  
427 and emission detection across the 490-526 nm range. Images were processed using Fiji (ImageJ)  
428 software (Schindelin et al. 2012).

#### 429 **Assessing water, H<sub>2</sub>O<sub>2</sub>, boric acid and urea permeability using high-throughput yeast-based 430 assays**

431 Yeast-based microculture assays (Groszmann et al. in preparation), were used to test membrane  
432 permeability to specific substrates associated with the expression of foreign AQPs which resulted in  
433 enhanced or impaired growth. H<sub>2</sub>O<sub>2</sub>, BA and Urea treatments were previously optimised in  
434 (Groszmann et al. in preparation). Yeast growth was monitored using a SPECTROStar nano absorbance  
435 microplate reader (BMG Labtech, Germany) at 10-20 minute intervals over 42 to 60 hours. Data  
436 collection and processing was consistent between each growth or toxicity-based assay.

437 **Water** permeability. We used the *aqy1 aqy2* yeast strain (null *aqy1 aqy2*; background  $\Sigma$ 1278b;  
438 genotype: Mat  $\alpha$ ; *leu2::hisG*; *trp1::hisG*, *his3::hisG*; *ura352 aqy1D::KanMX aqy2D::KanMX*, provided  
439 by Peter Dahl of the S. Hohmann lab) (Tanghe et al. 2002) exploiting the property of yeast cells that  
440 show increased freezing tolerance when they express functional water AQPs (Deshmukh et al. 2016).  
441 Yeast expressing NtAQPs and the empty vector were grown for 24-28 hours (OD<sub>650</sub> of 0.5-1) in 1.25mL  
442 YNB(-HIS), at 30°C, shaking at 250rpm. Cultures were diluted to 0.6x10<sup>7</sup> cells/mL in YPD medium and  
443 incubated at 30°C for 60 mins. 250µL of each culture was aliquoted to 2 Eppendorf tubes; one tube  
444 was placed on ice (untreated control) the other was used for two 'Freeze-thaw' cycles. Each 'Freeze  
445 thaw' cycle consisted of yeast culture aliquots being frozen in liquid nitrogen for 30 seconds, and  
446 thawed in a water bath at 30°C for 20 mins. For each construct, 'Untreated' and 'Treated' yeast were  
447 transferred into a 96 well plate (200µL aliquots) for growth monitoring.

448 **H<sub>2</sub>O<sub>2</sub>** permeability was assessed using a reactive oxygen species (ROS) hypersensitive yeast strain,  
449  $\Delta$ *skn7* (null *skn7*; background BY4741 genotype: Mat  $\alpha$ ; *his3 $\Delta$ 1 leu2 $\Delta$ 0 met15 $\Delta$ 0 ura3 $\Delta$ 0  $\Delta$ SKN7).  
450 Obtained from ATCC) (Bienert et al. 2007; Halliwell and Gutteridge 2015; Lee et al. 1999). Yeast's  
451 survival was further compromised if AQPs facilitated the diffusion (and accumulation) of H<sub>2</sub>O<sub>2</sub> into the  
452 cell, which enhanced the toxicity response.  $\Delta$ *skn7* yeast expressing NtAQPs and Empty vector were  
453 grown and diluted to 0.6x10<sup>7</sup> cells/mL as per the Freeze-thaw assay (above). 200µL microcultures of  
454 each NtAQP/Empty vector were distributed in 96-well plates with 190µL of yeast and 10µL H<sub>2</sub>O<sub>2</sub>  
455 treatments: 0mM/water, 0.25mM, 0.5mM and 1mM H<sub>2</sub>O<sub>2</sub>.*

456 **Boric acid (BA)** toxicity assays were used to assess AQP permeability to BA. Enhanced BA diffusion into  
457 yeast expressing AQP lead to greater sensitivity to BA treatments. *aqy1 aqy2* yeast expressing NtAQPs  
458 or Empty vector were grown and diluted to 0.6x10<sup>7</sup> cells/mL. 200µL microcultures each NtAQP/Empty  
459 vector were distributed in 96-well plates with 180µL of yeast and 20µL BA treatments: 0mM/water,  
460 10 mM, 20 mM and 30 mM BA.

461 **Urea** transport capability. *ynvwl* yeast (null *dur3*; background  $\Sigma$ 23346c; genotype: Mat  $\alpha$ ,  $\Delta$ *ura3*,  
462  $\Delta$ *dur3*, provided by Patrick Bienert of the Nicolaus von Wirén lab) is limited in growth due to a deletion  
463 of the *DUR3* urea transporter (Liu et al. 2003). Expression of urea-permeable AQPs in *ynvwl* yeast  
464 provided a growth advantage when exposed to media containing urea as the sole nitrogen source.  
465 *ynvwl* yeast spots were resuspended in 1.25mL of Yeast Basic media (YB, culture medium without  
466 nitrogen source) with 2% Glucose. Yeast cultures were diluted to  $1.2 \times 10^7$  cells/mL. 200 $\mu$ L  
467 microcultures for each NtAQP/Empty vector construct were distributed in 96-well plates with 190 $\mu$ L  
468 of yeast and 10 $\mu$ L urea treatments: 0mM/water, 1 mM, 4 mM and 12 mM urea.

469 The yeast microculture OD<sub>650</sub> readings for the water, H<sub>2</sub>O<sub>2</sub>, BA and urea assay were processed using a  
470 method developed by (Groszmann et al. in preparation). Growth curves were integrated using the  
471 natural log of OD<sub>650</sub>/initial OD<sub>650</sub> (Ln(OD<sub>t</sub>/OD<sub>i</sub>) vs time) up to a time when the growth rate of the  
472 Untreated culture had declined to 5% of its maximum. Area Under the Curve (AUC), was calculated as  
473 a proxy that captured the potential growth characteristics affected, regardless of the treatment, in a  
474 single parameter.

475

### 476 **Characterising *in planta* subcellular localisation of NtAQPs**

477 Tobacco AQP-GFP constructs were generated via Gateway cloning of NtAQP coding sequences from  
478 pZeo entry vectors into the pMDC43 destination vector (Curtis and Grossniklaus 2003); N-terminal  
479 GFP-NtAQP fusion proteins were driven by the constitutive 2x35S CaMV promoter. Arabidopsis  
480 transgenic lines were generated via agrobacterium (GV3101) floral dipping transformation method  
481 (Clough and Bent 1998). Seeds were liquid sterilised, washed and sown on Gamorg's B5 medium (0.8%  
482 Agar, hygromycin). 8-day-old Arabidopsis seedlings were gently removed from the agar, mounted in  
483 phosphate Buffer (100mM NaPO<sub>4</sub> buffer, pH 7.2) on a standard slide, covered with coverslip, and  
484 visualised with a Zeiss LSM 780 Confocal microscope using a 40x water immersion objective (1.2 NA).  
485 Light micrographs of cortical cells in the root elongation zone were visualised using Differential  
486 Interference Contrast (DIC), GFP fluorescence was captured using excitation at 488 nm and emission  
487 detection across 490-526 nm. Autofluorescence was detected across 570-674 nm and excluded from  
488 GFP detection channel. Images were processed using Fiji (ImageJ) software (Schindelin et al. 2012).  
489 Organelle-specific marker lines, established in Nelson et al. (2007) and previously published in De Rosa  
490 et al. (2020), were used to guide our interpretation of AQP subcellular localisations.

### 491 **3D protein homology modelling and characterisation of NtAQP pores**

492 We generated 3D models of the 9 NtAQPs functionally characterised in this study. The Spinach PIP2;1  
493 resolved crystal structure (Törnroth-Horsefield et al. 2006) and Arabidopsis TIP2;1, PDB:5i32.1.A  
494 (Kirscht et al. 2016), were used as templates for our modelling analyses. See Supplemental Methods  
495 S1 for more background detail.

496

### 497 **Acknowledgements**

498 We thank Rosemary White from CSIRO for providing seeds of the Tonoplast:GFP and ER:GFP marker  
499 lines (Nelson et al. 2007). The authors acknowledge the facilities and the scientific and technical  
500 assistance (Darryl Webb) of Microscopy Australia at the Advanced Imaging Precinct at the Australian  
501 National University; a facility funded by the ANU, and State and Federal Governments of Australia. We  
502 acknowledge that National Collaborative Research Infrastructure Strategy (NCRIS) of the Australian  
503 Government, providing The Australian National University with the growth facilities utilised as part of  
504 the Australian Plant Phenomics Facility.

505

506

507 **Table 1. Summary of NtAQP properties and other AQP isoforms characterised in other studies.**  
508 Permeability to water, H<sub>2</sub>O<sub>2</sub>, boric acid and urea, molecular diameter (Å) shown in parenthesis; in  
509 planta sub-cellular localisation in root cortical cells, Selectivity filter (SF), pore diameter (Å) and gene  
510 expression localisations (reported in De Rosa et al. 2020). Red tick (✓) denotes a positive permeability  
511 for a specific substrate with the number of ticks indicating the magnitude of phenotypic responses.  
512 One, two and three ticks represent a small, medium and large effect, respectively. C denotes water  
513 permeable when PIP2 co-expressed with PIP1 and permeability for other substrates when co-  
514 expressed. Cross (✖) denotes a negative permeability. Blanks indicate no data is available. Three sub-  
515 cellular localisations for the NtAQPs were tested: plasma membrane (PM), endoplasmic reticulum (ER)  
516 and tonoplast.

517

518

519

520

521

522

523

524

525

526

527

528

529

530

531

532

533

534

535

536

537

538

539

540

541

|                  | Water<br>(2.75 Å) | H <sub>2</sub> O <sub>2</sub><br>(2.8 Å) | Boric<br>Acid<br>(5.14 Å) | Urea<br>(5.22 Å) | In planta<br>subcellular<br>localisation | SF pore<br>diameter<br>(Å) | Expression<br>localisation         | Ref.                                   |
|------------------|-------------------|------------------------------------------|---------------------------|------------------|------------------------------------------|----------------------------|------------------------------------|----------------------------------------|
| ZmPIP1           | C                 | x                                        | x                         | x                |                                          |                            |                                    | (Fox et al. 2017)                      |
| AtPIP1;1         | C                 | ✓                                        | ✓✓                        | x                |                                          |                            |                                    | (Groszmann et al. in preparation)      |
| <b>NtPIP1;1t</b> | x                 | ✓                                        | x                         | x                | PM                                       | 2.40                       | Roots                              |                                        |
| <b>NtPIP1;3t</b> | x                 | x                                        | x                         | x                | PM                                       | 2.40                       | Whole plant                        |                                        |
| AtPIP1;4         | C                 | ✓✓                                       | x                         | x                |                                          |                            |                                    | (Groszmann et al. in preparation)      |
| <b>NtPIP1;5s</b> | x                 | x                                        | ✓                         | x                | PM                                       | 2.40                       | Leaves, stem, roots, flowers       |                                        |
| AtPIP2;4         | ✓                 | ✓                                        | x                         | x                |                                          |                            |                                    | (Groszmann et al. in preparation)      |
| <b>NtPIP2;4s</b> | ✓✓                | ✓✓✓                                      | x                         | x                | PM                                       | 2.40                       | Roots, flowers (low)               |                                        |
| <b>NtPIP2;5t</b> | ✓✓                | ✓✓                                       | x                         | x                | PM                                       | 2.40                       | Leaves                             |                                        |
| ZmPIP2;5         | ✓✓                | ✓✓                                       | -                         | -                |                                          |                            | Roots, stem, leaves,               | (Fox et al. 2017)                      |
| AtPIP2;7         | ✓✓                | ✓✓                                       | ✓                         | x                |                                          |                            |                                    | (Groszmann et al. in preparation)      |
| ZmNIP1;1         | ✓✓                | ✓                                        | ✓                         | x                |                                          |                            |                                    | (Fox et al. 2017)                      |
| AtNIP1;2         |                   | ✓                                        |                           |                  |                                          |                            |                                    | (Dynowski et al. 2008)                 |
| ZmNIP2;1         | ✓✓                | ✓                                        | ✓✓                        | ✓✓               |                                          |                            |                                    | (Fox et al. 2017)                      |
| <b>NtNIP2;1s</b> | x                 | ✓                                        | ✓                         | ✓✓               | ER + PM                                  | 3.50                       | Young flowers                      |                                        |
| AtNIP5;1         | ✓                 |                                          | ✓✓                        |                  |                                          |                            |                                    | (Takano et al. 2006; Wang et al. 2017) |
| <b>NtNIP5;1t</b> | x                 | x                                        | ✓                         | x                | ER + PM                                  | 3.26                       | Young flowers                      |                                        |
| AtNIP6;1         | x                 |                                          |                           | ✓✓               |                                          |                            |                                    | (Wallace and Roberts 2005)             |
| AtTIP1;1         | ✓✓                | ✓✓                                       |                           |                  |                                          |                            |                                    | (Bienert et al. 2007)                  |
| <b>NtTIP1;1s</b> | ✓✓                | ✓                                        | ✓✓                        | ✓                | Tonoplast                                | 2.75                       | Leaves, flowers                    |                                        |
| ZmTIP1;1         | ✓✓                | ✓✓                                       | ✓✓                        | ✓✓               |                                          |                            |                                    | (Fox et al. 2017)                      |
| AtTIP1;3         | ✓✓                |                                          | x                         | ✓✓               |                                          |                            |                                    | (Soto et al. 2008)                     |
| AtTIP2;1         | ✓                 |                                          |                           | ✓                |                                          |                            |                                    | (Liu et al. 2003)                      |
| <b>NtTIP2;5t</b> | ✓                 | x                                        | ✓✓                        | ✓                | Tonoplast                                | 2.75                       | Roots, leaves (low), flowers (low) |                                        |

542

543

544

545

546 **Figure 1. Phylogeny of the NtAQP family, highlighting genes selected for functional characterisation**  
547 **in this study.** The phylogenetic tree was generated using the neighbour-joining method from MUSCLE  
548 aligned protein sequences. Confidence levels (%) of branch point generated through bootstrapping  
549 analysis (n=1000). Red arrows point to PIP (PIP1;1t, PIP1;3t, PIP1;5s, PIP2;4s, PIP2;5t), TIP (TIP1;1s,  
550 TIP2;5t) and NIP (NIP2;1s and NIP5;1t) isoforms functionally characterised in this study.

551 **Figure 2. Subcellular localisation of GFP tagged aquaporins expressed in yeast.** Confocal microscopy  
552 images of yeast expressing GFP::NtAQP fusions of **A.** NtPIP1;1t, **B.** NtPIP1;3t, **C.** NtPIP1;5s, **D.**  
553 NtPIP2;4s, **E.** NtPIP2;5t, **F.** NtNIP2;1s, **G.** NtNIP5;1t, **H.** NtTIP1;1s, **I.** NtTIP2;5t and **J.** Free GFP  
554 localisation. For each construct we report a Brightfield + GFP overlay image of a yeast cell; a GFP only  
555 image; a surface plot profile of GFP signal intensity at the imaged focal plane; and a line scan of signal  
556 intensity traversing the cell (indicated by white arrow in GFP only image). Grey shading in GFP signal  
557 line scan corresponds to regions which align with the plasma membrane (PM). PM, endoplasmic  
558 reticulum (ER) and vacuole (V) are labelled. Scale bar 2µm.

559 **Figure 3. NtAQP water permeability assessed with the ‘Freeze-thaw’ assay.** Yeast growth curves,  
560 Ln(OD/OD<sub>i</sub>) vs. time, of aqy1 aqy2 yeast expressing **A.** Empty vector control or **B.** a freeze-thaw  
561 tolerant AQP (NtPIP2;4s), exposed to freeze-thaw treatments. Growth was assessed from the area  
562 under the curves (AUC) until the vertical dashed lines. **C.** Yeast culture growth following the freeze-  
563 thaw treatment (AUC relative to untreated yeast control) for aqy1 aqy2 yeast expressing an Empty  
564 vector or one of the 9 NtAQPs. Asterisks denote significantly greater growth following the freeze -  
565 thaw treatment compared against Empty vector from an ANOVA with Fishers LSD test: “\*\*\*” p<0.01  
566 and “\*\*\*\*” p<0.001, N=6, Error bars = SE.

567 **Figure 4. NtAQP H<sub>2</sub>O<sub>2</sub> permeability assay.** Yeast growth curves, Ln(OD/OD<sub>i</sub>) vs. time, of snk7 yeast  
568 expressing **A.** Empty vector control or **B.** an H<sub>2</sub>O<sub>2</sub>-sensitive AQP (NtPIP2;4s), exposed to 0.25mM,  
569 0.5mM and 1mM H<sub>2</sub>O<sub>2</sub> treatments. Growth was assessed from the area under the curves (AUC) until  
570 the vertical dashed lines. **C.** Yeast culture growth relative to ‘Untreated’ control (AUC relative to  
571 untreated), for snk7 yeast expressing an Empty vector or one the 9 NtAQPs. Asterisks denote One-way  
572 ANOVA with Fishers LSD test results comparing H<sub>2</sub>O<sub>2</sub>-treated yeast growth against Empty vector; “\*”  
573 p<0.05, “\*\*\*” p<0.01 and “\*\*\*\*” p<0.001. N=6, Error bars=SE.

574 **Figure 5. Boric acid permeability assay for yeast expressing NtAQPs.** Yeast growth curves,  
575 Ln(OD/OD<sub>i</sub>) vs. time, of aqy1 aqy2 yeast expressing **A.** Empty vector control or **B.** a boric acid-sensitive  
576 AQP (NtTIP1;1s), exposed to 10mM, 20mM and 30mM boric acid treatments. Growth was assessed  
577 from the area under the curves (AUC) until the vertical dashed lines. **C.** Yeast culture growth relative  
578 to untreated control (AUC) of aqy1 aqy2 yeast expressing either an Empty vector or one of the 9  
579 NtAQPs exposed to boric acid. Asterisks denote growth that was significantly different to Empty Vector  
580 using a One-Way ANOVA with Fishers LSD test; “\*” p<0.05, “\*\*\*” p<0.01 and “\*\*\*\*” p<0.001, N=6, Error  
581 bars=SE.

582 **Figure 6. Urea permeability assays for yeast expressing NtAQPs.** Yeast growth curves, Ln(OD/OD<sub>i</sub>)  
583 vs. time, of ynvwl yeast expressing **A.** Empty vector control or **B.** a urea-permeable AQP (NtNIP2;1s),  
584 exposed to 0mM, 2mM, 4mM or 12mM urea treatments. Growth was assessed from the area under  
585 the curves (AUC) until the vertical dashed lines. **C.** AUC relative to 0mM Urea treatment of ynvwl yeast  
586 expressing either an Empty vector or one of the 9 screened NtAQPs. Asterisks denote growth that was  
587 significantly greater than Empty vector using a One-way ANOVA with Fishers LSD test, “\*” p<0.05,  
588 “\*\*\*” p<0.01 and “\*\*\*\*” p<0.001. N=6, Error bars=SE.

589 **Figure 7. In planta sub-cellular localisation of NtAQPs.** Confocal images of root cortical cells of  
590 transgenic 8-day old Arabidopsis seedlings. GFP marker lines; false coloured purple: **A.** plasma  
591 membrane, GFP:PM, **B.** endoplasmic reticulum, GFP:ER, **C.** tonoplast, GFP:tono. **GFP::NtAQP** lines: **D.**  
592 NtPIP1;1t, **E.** NtPIP1;3t, **F.** NtPIP1;5s, **G.** NtPIP2;4s, **H.** NtPIP2;5t, **I.** NtNIP2;1s, **J.** NtNIP5;1t, **K.** NtTIP1;1s  
593 and **L.** NtTIP2;5t. A region of the membrane (indicated by white dashed boxes, 5µm x 20µm

594 dimension) is magnified in the panel below each confocal image to show surface profiles.  
595 Transvacuolar strands are denoted by V. White arrows highlight peak intensity discrepancies present  
596 in the NIPs assigned to AQP integration into the ER and PM. Scale bar 5 $\mu$ m.

597 **Figure 8. Modelled NtAQP pore features.** **A.** Pore profiles of PIPs (PIP1;1t, PIP1;3t, PIP1;5s, PIP2;4s,  
598 PIP2;5t; blue), TIP1;1s (light purple), TIP2;5t (dark purple), NIP2;1s (dark green) and NIP5;1t (light  
599 green). **B.** A 3D protein model highlighting the Selectivity Filter region (SF, orange residue in 3D Protein  
600 model) and NPA region (dark red residues in 3D protein model). **C.** Amino acid residues forming the  
601 selectivity filter and the diameter at its narrowest point, viewed perpendicular to the membrane plane  
602 from the extracellular side. **D.** NPA motifs: NPA 1 and NPA 2 composition of PIPs, TIP1;1s, TIP2;5t,  
603 NIP2;1s and NIP5;1t.

604

605 **Figure 9. Hydrophobicity and flexibility profiles of NtAQP pores.** **A.** 3D Pore model illustrates  
606 orientation of the pore profile with the apoplastic entrance (red ball, top), cytosolic entrance (green  
607 ball, bottom), residues contacting the pore (yellow balls) and the area inside the AQP pore (blue). Pore  
608 profile diameters from ChexVis software (note maximum diameter and pore length scales for each  
609 AQP), superimposed with Hydrophobicity (Left hand, Blue to Red indicating low to high  
610 hydrophobicity, respectively) and Flexibility (Right hand, Blue to Red indicating low to high flexibility,  
611 respectively): **B.** NtTIPs (NtTIP1;1s and NtTIP2;5t.) **C.** NtNIPs (NtNIP2;1s, NtNIP5;1t) and **D.** NtPIPs  
612 (NtPIP1;1t, NtPIP1;3t, NtPIP1;5s, NtPIP2;4s, NtPIP2;5t). Black dots to the left of each pore profile  
613 correspond to contact residue interactions for which hydrophobicity and flexibility outputs were  
614 generated. Red brackets indicate Selectivity Filter (SF) region and grey brackets indicate NPA region.

615

616

617

618

619

620

621

622

623

624

625

626

627

628

629

630

631

## 632 References

633

- 634 Abascal F, Irisarri I, Zardoya R (2014) Diversity and evolution of membrane intrinsic proteins.  
635 *Biochimica et Biophysica Acta (BBA)-General Subjects* 1840 (5):1468-1481
- 636 Ahmed J, Mercx S, Boutry M, Chaumont F (2020) Evolutionary and predictive functional insights into  
637 the aquaporin gene family in the allotetraploid plant *Nicotiana tabacum*. *International*  
638 *journal of molecular sciences* 21 (13):4743
- 639 Alberti S, Gitler AD, Lindquist S (2007) A suite of Gateway® cloning vectors for high-throughput  
640 genetic analysis in *Saccharomyces cerevisiae*. *Yeast* 24 (10):913-919
- 641 Anderberg HI, Kjellbom P, Johanson U (2012) Annotation of *Selaginella moellendorffii* major intrinsic  
642 proteins and the evolution of the protein family in terrestrial plants. *Frontiers in plant*  
643 *science* 3:33
- 644 Azad AK, Ahmed J, Alum MA, Hasan MM, Ishikawa T, Sawa Y, Katsuhara M (2016) Genome-wide  
645 characterization of major intrinsic proteins in four grass plants and their non-aqua transport  
646 selectivity profiles with comparative perspective. *PLoS One* 11 (6):e0157735
- 647 Bansal A, Sankararamkrishnan R (2007) Homology modeling of major intrinsic proteins in rice,  
648 maize and *Arabidopsis*: comparative analysis of transmembrane helix association and  
649 aromatic/arginine selectivity filters. *BMC Structural Biology* 7 (1):27
- 650 Bi Z, Merl-Pham J, Uehlein N, Zimmer I, Mühlhans S, Aichler M, Walch AK, Kaldenhoff R, Palme K,  
651 Schnitzler J-P (2015) RNAi-mediated downregulation of poplar plasma membrane intrinsic  
652 proteins (PIPs) changes plasma membrane proteome composition and affects leaf  
653 physiology. *Journal of proteomics* 128:321-332
- 654 Bienert GP, Chaumont F (2014) Aquaporin-facilitated transmembrane diffusion of hydrogen  
655 peroxide. *Biochimica et Biophysica Acta (BBA)-General Subjects* 1840 (5):1596-1604
- 656 Bienert GP, Desguin B, Chaumont F, Hols P (2013) Channel-mediated lactic acid transport: a novel  
657 function for aquaglyceroporins in bacteria. *Biochemical Journal* 454 (3):559-570
- 658 Bienert GP, Møller AL, Kristiansen KA, Schulz A, Møller IM, Schjoerring JK, Jahn TP (2007) Specific  
659 aquaporins facilitate the diffusion of hydrogen peroxide across membranes. *Journal of*  
660 *Biological Chemistry* 282 (2):1183-1192
- 661 Bienert MD, Diehn TA, Richet N, Chaumont F, Bienert GP (2018) Heterotetramerization of plant PIP1  
662 and PIP2 aquaporins is an evolutionary ancient feature to guide PIP1 plasma membrane  
663 localization and function. *Frontiers in plant science* 9:382
- 664 Byrt CS, Zhao M, Kourghi M, Bose J, Henderson SW, Qiu J, Gilliam M, Schultz C, Schwarz M, Ramesh  
665 SA (2017) Non-selective cation channel activity of aquaporin AtPIP2; 1 regulated by Ca<sup>2+</sup> and  
666 pH. *Plant, cell & environment* 40 (6):802-815
- 667 Chaumont F, Tyerman S (2017) *Plant Aquaporins*. Springer,
- 668 Chaumont F, Tyerman SD (2014) Aquaporins: Highly regulated channels controlling plant water  
669 relations. *Plant Physiology* 164 (4):1600-1618. doi:10.1104/pp.113.233791
- 670 Choi W-G, Roberts DM (2007) *Arabidopsis* NIP2; 1, a major intrinsic protein transporter of lactic acid  
671 induced by anoxic stress. *Journal of Biological Chemistry* 282 (33):24209-24218
- 672 Curtis MD, Grossniklaus U (2003) A gateway cloning vector set for high-throughput functional  
673 analysis of genes in planta. *Plant physiology* 133 (2):462-469
- 674 Danielson JÅ, Johanson U (2008) Unexpected complexity of the aquaporin gene family in the moss  
675 *Physcomitrella patens*. *BMC Plant Biology* 8 (1):45
- 676 De Rosa A, Watson-Lazowski A, Evans JR, Groszmann M (2020) Genome-wide identification and  
677 characterisation of Aquaporins in *Nicotiana tabacum* and their relationships with other  
678 Solanaceae species. *BMC Plant Biology* 20 (1):1-29
- 679 Deshmukh RK, Sonah H, Bélanger RR (2016) Plant Aquaporins: genome-wide identification,  
680 transcriptomics, proteomics, and advanced analytical tools. *Frontiers in plant science* 7:1896



- 681 Dordas C, Chrispeels MJ, Brown PH (2000) Permeability and channel-mediated transport of boric  
682 acid across membrane vesicles isolated from squash roots. *Plant physiology* 124 (3):1349-  
683 1362
- 684 Dynowski M, Schaaf G, Loque D, Moran O, Ludewig U (2008) Plant plasma membrane water  
685 channels conduct the signalling molecule H<sub>2</sub>O<sub>2</sub>. *Biochemical Journal* 414 (1):53-61
- 686 Fetter K, Van Wilder V, Moshelion M, Chaumont F (2004) Interactions between plasma membrane  
687 aquaporins modulate their water channel activity. *The Plant Cell* 16 (1):215-228
- 688 Fitzpatrick KL, Reid RJ (2009) The involvement of aquaglyceroporins in transport of boron in barley  
689 roots. *Plant, cell & environment* 32 (10):1357-1365
- 690 Flexas J, Ribas-Carbó M, Hanson DT, Bota J, Otto B, Cifre J, McDowell N, Medrano H, Kaldenhoff R  
691 (2006) Tobacco aquaporin NtAQP1 is involved in mesophyll conductance to CO<sub>2</sub> in vivo. *The*  
692 *Plant Journal* 48 (3):427-439
- 693 Fox AR, Maistriaux LC, Chaumont F (2017) Toward understanding of the high number of plant  
694 aquaporin isoforms and multiple regulation mechanisms. *Plant Science* 264:179-187
- 695 Gomes D, Agasse A, Thiébaud P, Delrot S, Gerós H, Chaumont F (2009) Aquaporins are  
696 multifunctional water and solute transporters highly divergent in living organisms.  
697 *Biochimica et Biophysica Acta (BBA)-Biomembranes* 1788 (6):1213-1228
- 698 Groszmann M, De Rosa A, Ahmed J, Chaumont F, Evans JR (2021) A consensus on the Aquaporin  
699 Gene Family in the Allotetraploid Plant, *Nicotiana tabacum*. *Plant Direct*  
700 doi:10.1002/PLD3.321
- 701 Groszmann M, De Rosa A, Chen W, Qiu J, Byrt CS, Evans JR (in preparation) Characterising the  
702 permeability of all 13 Arabidopsis PIP genes using a high throughput yeast approach. . *Plant*  
703 *Physiology*
- 704 Groszmann M, Osborn HL, Evans JR (2017) Carbon dioxide and water transport through plant  
705 aquaporins. *Plant, Cell & Environment* 40 (6):938-961
- 706 Hachez C, Zelazny E, Chaumont F (2006) Modulating the expression of aquaporin genes in planta: a  
707 key to understand their physiological functions? *Biochimica et Biophysica Acta (BBA)-*  
708 *Biomembranes* 1758 (8):1142-1156
- 709 Halliwell B, Gutteridge JM (2015) *Free radicals in biology and medicine*. Oxford University Press, USA,
- 710 Hanaoka H, Uruguchi S, Takano J, Tanaka M, Fujiwara T (2014) OsNIP3; 1, a rice boric acid channel,  
711 regulates boron distribution and is essential for growth under boron-deficient conditions.  
712 *The Plant Journal* 78 (5):890-902
- 713 Hove RM, Bhawe M (2011) Plant aquaporins with non-aqua functions: deciphering the signature  
714 sequences. *Plant Molecular Biology* 75 (4):413-430. doi:10.1007/s11103-011-9737-5
- 715 Johanson U, Gustavsson S (2002) A new subfamily of major intrinsic proteins in plants. *Molecular*  
716 *Biology and Evolution* 19 (4):456-461
- 717 Kaldenhoff R, Bertl A, Otto B, Moshelion M, Uehlein N (2007) Characterization of plant aquaporins.  
718 In: *Methods in enzymology*, vol 428. Elsevier, pp 505-531
- 719 Kaldenhoff R, Fischer M (2006) Aquaporins in plants. *Acta Physiologica* 187 (1-2):169-176
- 720 Kirscht A, Kaptan SS, Bienert GP, Chaumont F, Nissen P, de Groot BL, Kjellbom P, Gourdon P,  
721 Johanson U (2016) Crystal structure of an ammonia-permeable aquaporin. *PLoS biology* 14  
722 (3):e1002411
- 723 Kumar K, Mosa KA, Chhikara S, Musante C, White JC, Dhankher OP (2014) Two rice plasma  
724 membrane intrinsic proteins, OsPIP2; 4 and OsPIP2; 7, are involved in transport and  
725 providing tolerance to boron toxicity. *Planta* 239 (1):187-198
- 726 Kumar K, Mosa KA, Meselhy AG, Dhankher OP (2018) Molecular insights into the plasma membrane  
727 intrinsic proteins roles for abiotic stress and metalloids tolerance and transport in plants.  
728 *Indian Journal of Plant Physiology* 23 (4):721-730
- 729 Kumar S, Stecher G, Tamura K (2016) MEGA7: molecular evolutionary genetics analysis version 7.0  
730 for bigger datasets. *Molecular biology and evolution* 33 (7):1870-1874

- 731 Lee J, Godon C, Lagniel G, Spector D, Garin J, Labarre J, Toledano MB (1999) Yap1 and Skn7 control  
732 two specialized oxidative stress response regulons in yeast. *Journal of Biological Chemistry*  
733 274 (23):16040-16046
- 734 Liu L-H, Ludewig U, Gassert B, Frommer WB, von Wirén N (2003) Urea transport by nitrogen-  
735 regulated tonoplast intrinsic proteins in Arabidopsis. *Plant physiology* 133 (3):1220-1228
- 736 Liu S, Fukumoto T, Gena P, Feng P, Sun Q, Li Q, Matsumoto T, Kaneko T, Zhang H, Zhang Y (2020)  
737 Ectopic expression of a rice plasma membrane intrinsic protein (OsPIP1; 3) promotes plant  
738 growth and water uptake. *The Plant Journal* 102 (4):779-796
- 739 Loqué D, Ludewig U, Yuan L, von Wirén N (2005) Tonoplast intrinsic proteins AtTIP2; 1 and AtTIP2; 3  
740 facilitate NH<sub>3</sub> transport into the vacuole. *Plant physiology* 137 (2):671-680
- 741 Luang S, Hrmova M (2017) Structural basis of the permeation function of plant aquaporins. In: *Plant*  
742 *Aquaporins*. Springer, pp 1-28
- 743 Maurel C, Boursiac Y, Luu D-T, Santoni V, Shahzad Z, Verdoucq L (2015) Aquaporins in plants.  
744 *Physiological reviews* 95 (4):1321-1358
- 745 Maurel C, Reizer J, Schroeder JI, Chrispeels MJ (1993) The vacuolar membrane protein gamma-TIP  
746 creates water specific channels in *Xenopus* oocytes. *The EMBO Journal* 12 (6):2241-2247
- 747 Maurel C, Verdoucq L, Luu D-T, Santoni V (2008) Plant aquaporins: membrane channels with  
748 multiple integrated functions. *Annu Rev Plant Biol* 59:595-624
- 749 Mitani-Ueno N, Yamaji N, Zhao F-J, Ma JF (2011) The aromatic/arginine selectivity filter of NIP  
750 aquaporins plays a critical role in substrate selectivity for silicon, boron, and arsenic. *Journal*  
751 *of experimental botany* 62 (12):4391-4398
- 752 Mitani N, Yamaji N, Ma JF (2008) Characterization of substrate specificity of a rice silicon transporter,  
753 Lsi1. *Pflügers Archiv-European Journal of Physiology* 456 (4):679-686
- 754 Navarro-RóDenas A, Xu H, Kempainen M, Pardo AG, Zwiazek JJ (2015) L accaria bicolor aquaporin  
755 LbAQP1 is required for H<sub>2</sub>O net development in trembling aspen (*P. opulus tremuloides*).  
756 *Plant, cell & environment* 38 (11):2475-2486
- 757 Nelson BK, Cai X, Nebenführ A (2007) A multicolored set of in vivo organelle markers for co-  
758 localization studies in Arabidopsis and other plants. *The Plant Journal* 51 (6):1126-1136
- 759 Pommerrenig B, Diehn TA, Bienert GP (2015) Metalloido-porins: Essentiality of Nodulin 26-like  
760 intrinsic proteins in metalloid transport. *Plant Science* 238:212-227
- 761 Qiu J, McGaughey SA, Groszmann M, Tyerman SD, Byrt CS (2020) Phosphorylation influences water  
762 and ion channel function of AtPIP2; 1. *Plant, Cell & Environment* 43 (10):2428-2442
- 763 Sabir F, Leandro MJ, Martins AP, Loureiro-Dias MC, Moura TF, Soveral G, Prista C (2014) Exploring  
764 three PIPs and three TIPs of grapevine for transport of water and atypical substrates through  
765 heterologous expression in aqy-null yeast. *PLoS one* 9 (8):e102087
- 766 Schindelin J, Arganda-Carreras I, Frise E, Kaynig V, Longair M, Pietzsch T, Preibisch S, Rueden C,  
767 Saalfeld S, Schmid B (2012) Fiji: an open-source platform for biological-image analysis.  
768 *Nature methods* 9 (7):676
- 769 Soto G, Alleva K, Mazzella MA, Amodeo G, Muschietti JP (2008) AtTIP1; 3 and AtTIP5; 1, the only  
770 highly expressed Arabidopsis pollen-specific aquaporins, transport water and urea. *FEBS*  
771 *letters* 582 (29):4077-4082
- 772 Sui H, Han B-G, Lee JK, Walian P, Jap BK (2001) Structural basis of water-specific transport through  
773 the AQP1 water channel. *Nature* 414 (6866):872
- 774 Takano J, Wada M, Ludewig U, Schaaf G, Von Wirén N, Fujiwara T (2006) The Arabidopsis major  
775 intrinsic protein NIP5; 1 is essential for efficient boron uptake and plant development under  
776 boron limitation. *The Plant Cell* 18 (6):1498-1509
- 777 Tanaka M, Wallace IS, Takano J, Roberts DM, Fujiwara T (2008) NIP6; 1 is a boric acid channel for  
778 preferential transport of boron to growing shoot tissues in Arabidopsis. *The Plant Cell* 20  
779 (10):2860-2875

- 780 Tanghe A, Van Dijck P, Dumortier F, Teunissen A, Hohmann S, Thevelein JM (2002) Aquaporin  
781 expression correlates with freeze tolerance in baker's yeast, and overexpression improves  
782 freeze tolerance in industrial strains. *Appl Environ Microbiol* 68 (12):5981-5989  
783 Törnroth-Horsefield S, Wang Y, Hedfalk K, Johanson U, Karlsson M, Tajkhorshid E, Neutze R, Kjellbom  
784 P (2006) Structural mechanism of plant aquaporin gating. *Nature* 439 (7077):688  
785 Tyerman SD, McGaughey SA, Qiu J, Yool AJ, Byrt CS (2021) Adaptable and multifunctional ion-  
786 conducting aquaporins. *Annual Review of Plant Biology* 72  
787 Uehlein N, Lovisolo C, Siefritz F, Kaldenhoff R (2003) The tobacco aquaporin NtAQP1 is a membrane  
788 CO<sub>2</sub> pore with physiological functions. *Nature* 425 (6959):734-737  
789 Wallace IS, Choi W-G, Roberts DM (2006) The structure, function and regulation of the nodulin 26-  
790 like intrinsic protein family of plant aquaglyceroporins. *Biochimica et Biophysica Acta (BBA)-*  
791 *Biomembranes* 1758 (8):1165-1175  
792 Wallace IS, Roberts DM (2004) Homology modeling of representative subfamilies of Arabidopsis  
793 major intrinsic proteins. Classification based on the aromatic/arginine selectivity filter. *Plant*  
794 *Physiology* 135 (2):1059-1068  
795 Wallace IS, Roberts DM (2005) Distinct transport selectivity of two structural subclasses of the  
796 nodulin-like intrinsic protein family of plant aquaglyceroporin channels. *Biochemistry* 44  
797 (51):16826-16834  
798 Wang S, Yoshinari A, Shimada T, Hara-Nishimura I, Mitani-Ueno N, Ma JF, Naito S, Takano J (2017)  
799 Polar localization of the NIP5; 1 boric acid channel is maintained by endocytosis and  
800 facilitates boron transport in Arabidopsis roots. *The Plant Cell* 29 (4):824-842  
801 Wu B, Beitz E (2007) Aquaporins with selectivity for unconventional permeants. *Cellular and*  
802 *molecular life sciences* 64 (18):2413-2421  
803 Zwiazek JJ, Xu H, Tan X, Navarro-Ródenas A, Morte A (2017) Significance of oxygen transport through  
804 aquaporins. *Scientific reports* 7:40411

805

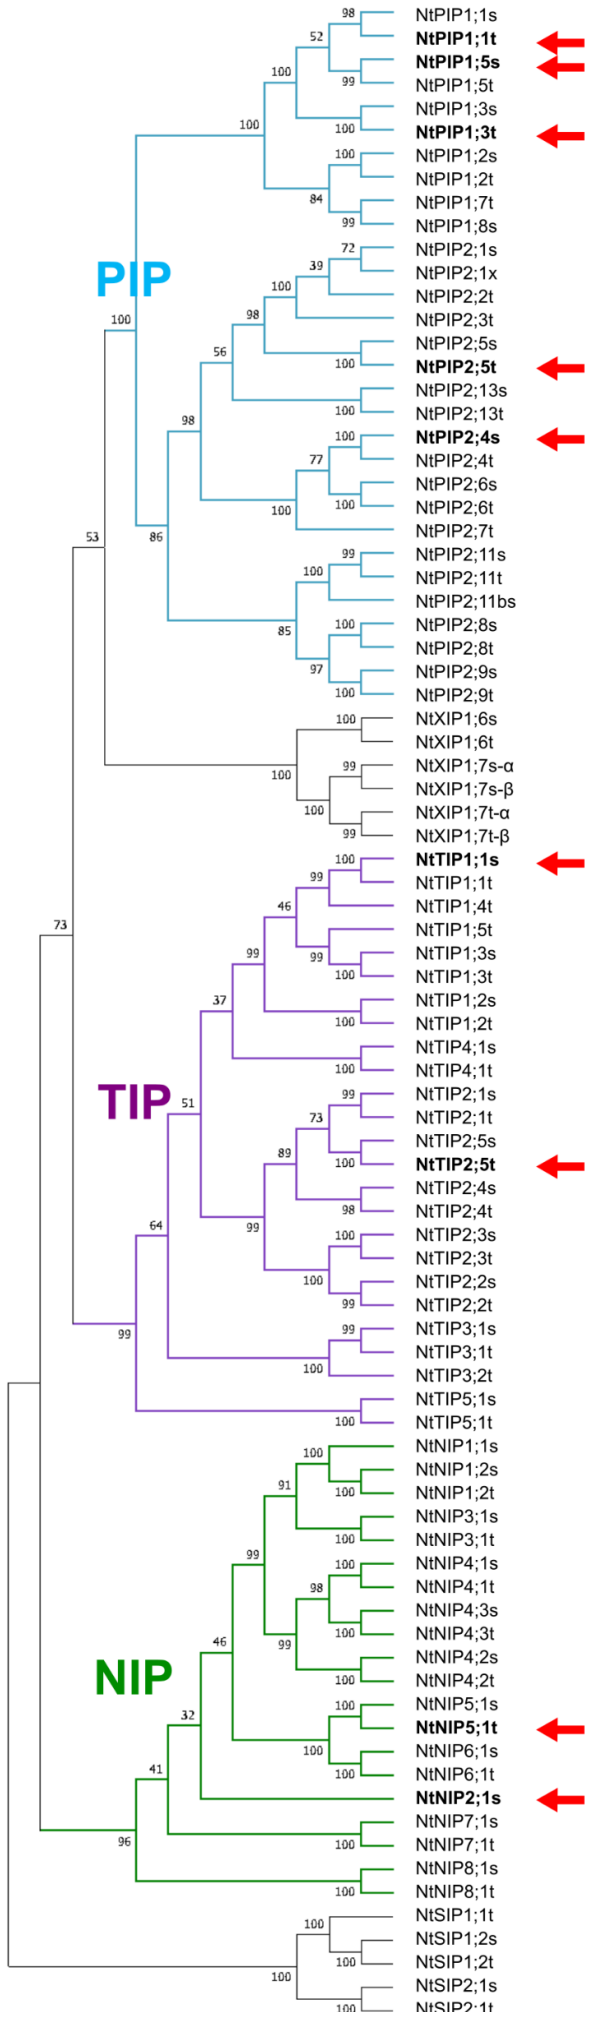

**Figure 1. Phylogeny of the NtAQP family, highlighting genes selected for functional characterisation in this study.** The phylogenetic tree was generated using the neighbour-joining method from MUSCLE aligned protein sequences. Confidence levels (%) of branch point generated through bootstrapping analysis (n=1000). Red arrows point to PIP (PIP1;1t, PIP1;3t, PIP1;5s, PIP2;4s, PIP2;5t), TIP (TIP1;1s, TIP2;5t) and NIP (NIP2;1s and NIP5;1t) isoforms functionally characterised in this study.

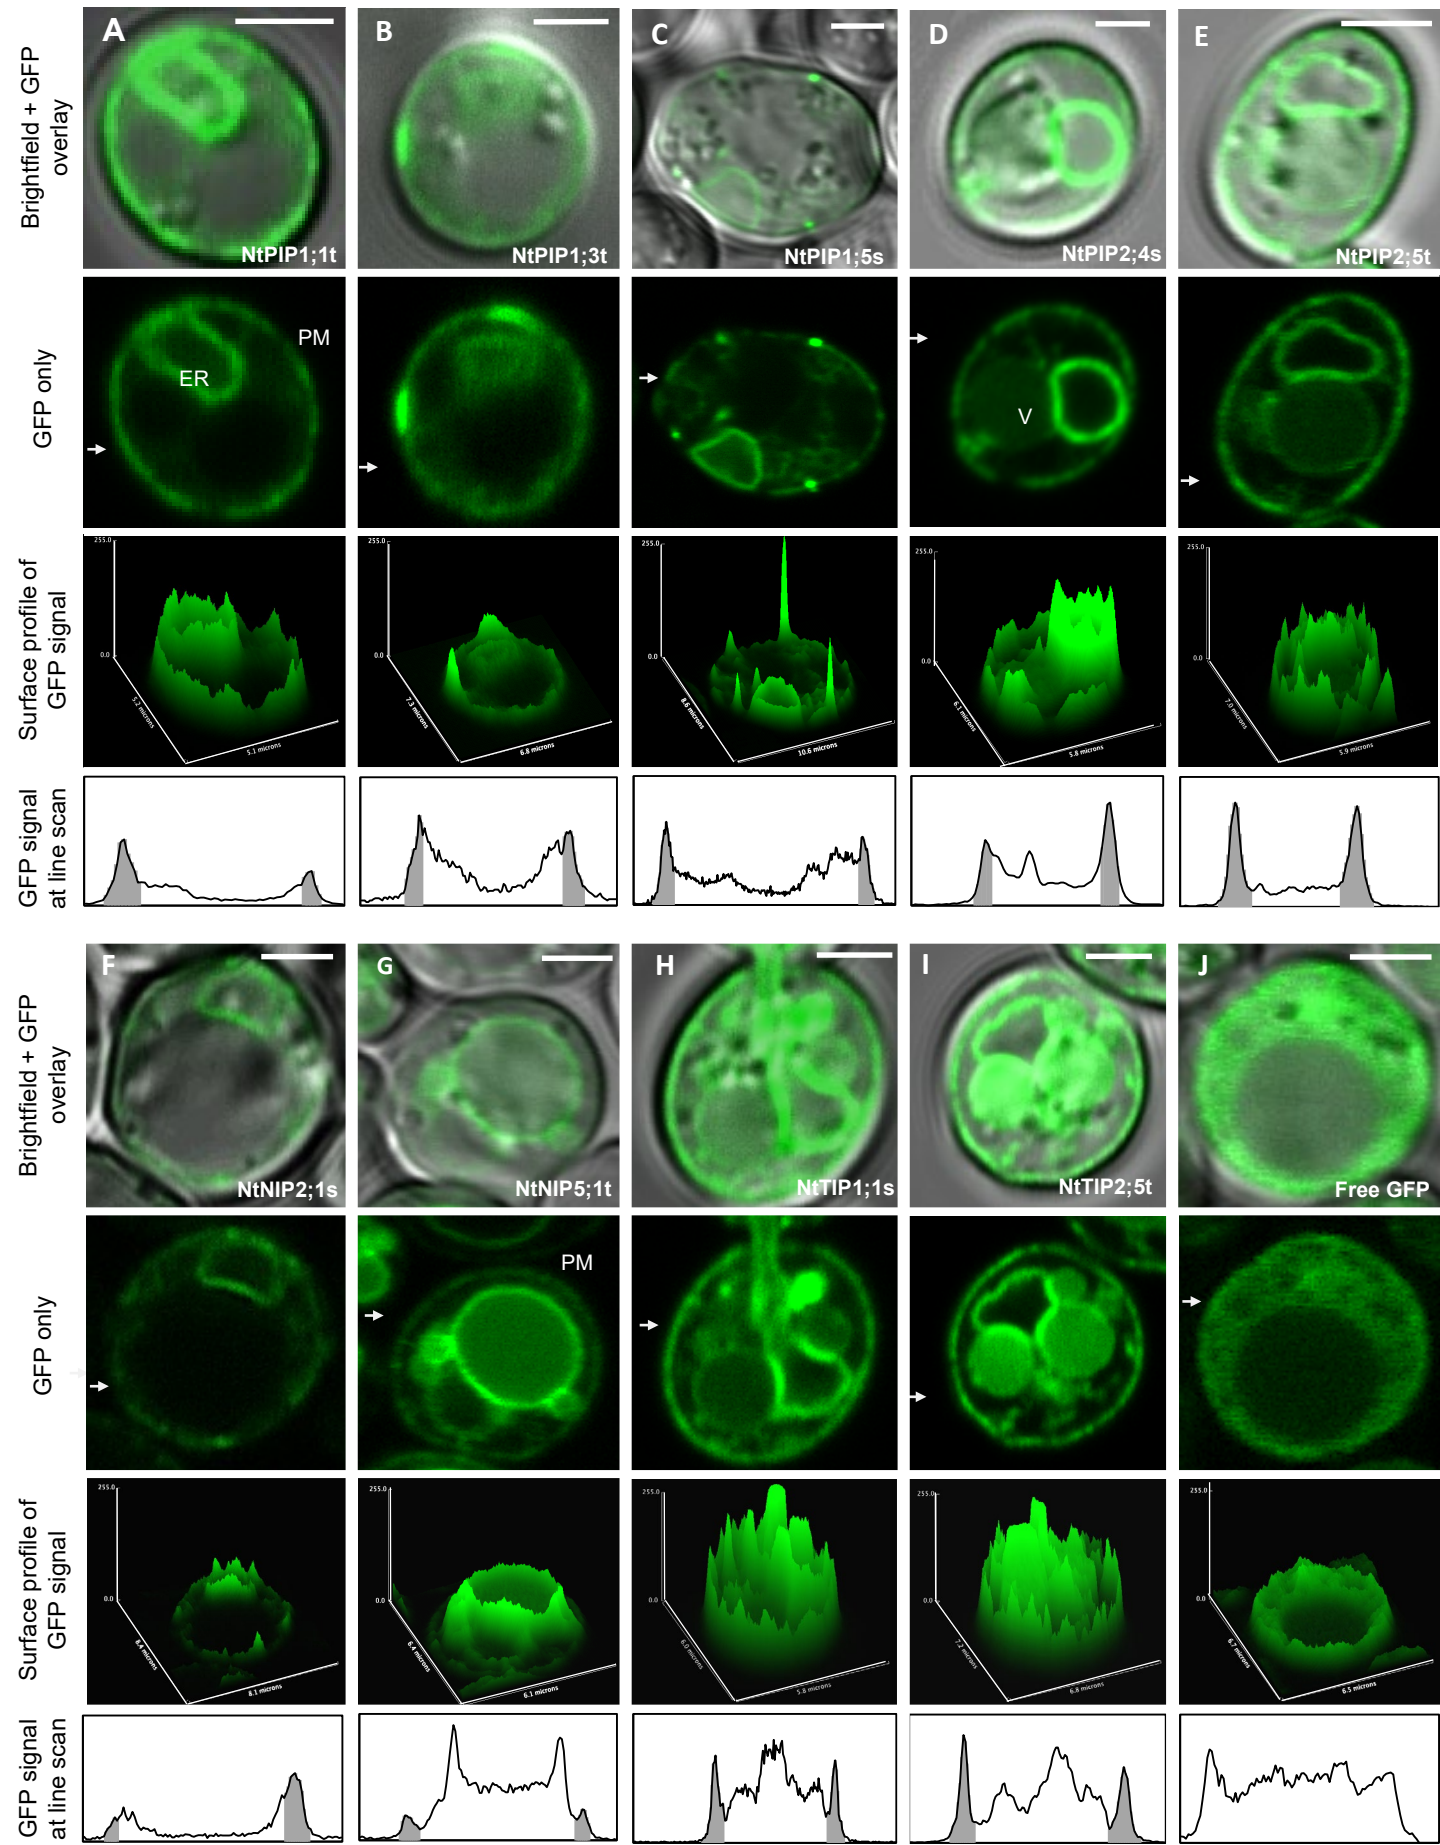

**Figure 2. Subcellular localisation of GFP tagged aquaporins expressed in yeast.** Confocal microscopy images of yeast expressing GFP::NtAQP fusions of **A.** NtPIP1;1t, **B.** NtPIP1;3t, **C.** NtPIP1;5s, **D.** NtPIP2;4s, **E.** NtPIP2;5t, **F.** NtNIP2;1s, **G.** NtNIP5;1t, **H.** NtTIP1;1s, **I.** NtTIP2;5t and **J.** Free GFP localisation. For each construct we report a Brightfield + GFP overlay image of a yeast cell; a GFP only image; a surface plot profile of GFP signal intensity at the imaged focal plane; and a line scan of signal intensity traversing the cell (indicated by white arrow in GFP only image). Grey shading in GFP signal line scan corresponds to regions which align with the plasma membrane (PM). PM, endoplasmic reticulum (ER) and vacuole (V) are labelled. Scale bar 2 $\mu$ m.

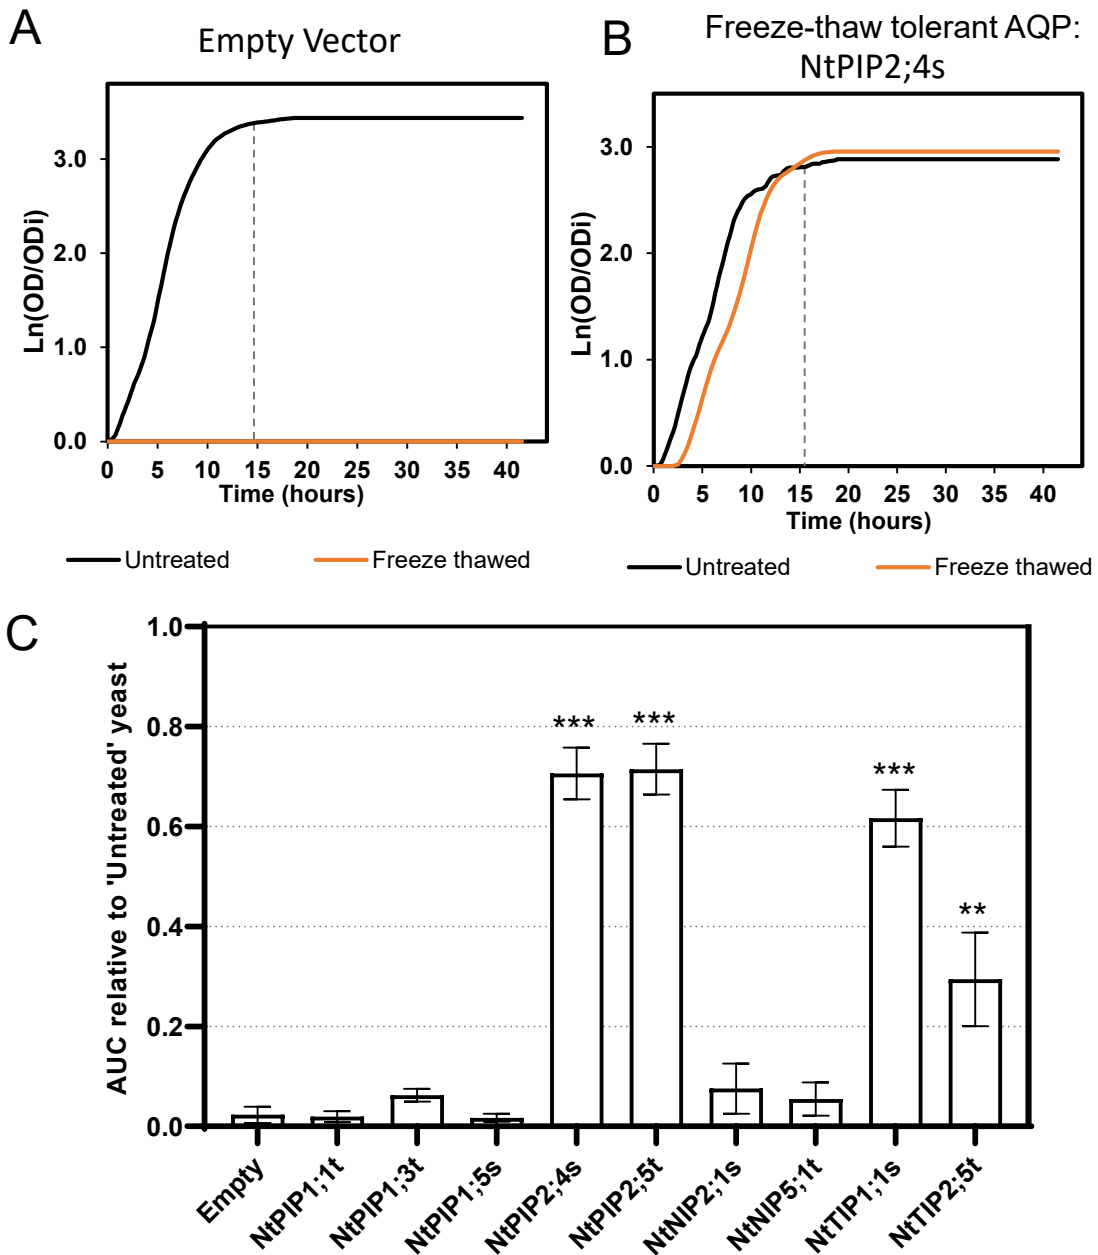

**Figure 3. NtAQP water permeability assessed with the 'Freeze-thaw' assay.** Yeast growth curves, Ln(OD/OD<sub>i</sub>) vs. time, of aqy1 aqy2 yeast expressing **A.** Empty vector control or **B.** a freeze-thaw tolerant AQP (NtPIP2;4s), exposed to freeze-thaw treatments. Growth was assessed from the area under the curves (AUC) until the vertical dashed lines. **C.** Yeast culture growth following the freeze-thaw treatment (AUC relative to untreated yeast control) for aqy1 aqy2 yeast expressing an Empty vector or one of the 9 NtAQPs. Asterisks denote significantly greater growth following the freeze – thaw treatment compared against Empty vector from an ANOVA with Fishers LSD test: “\*\*\*” p<0.01 and “\*\*\*\*” p<0.001, N=6, Error bars = SE.

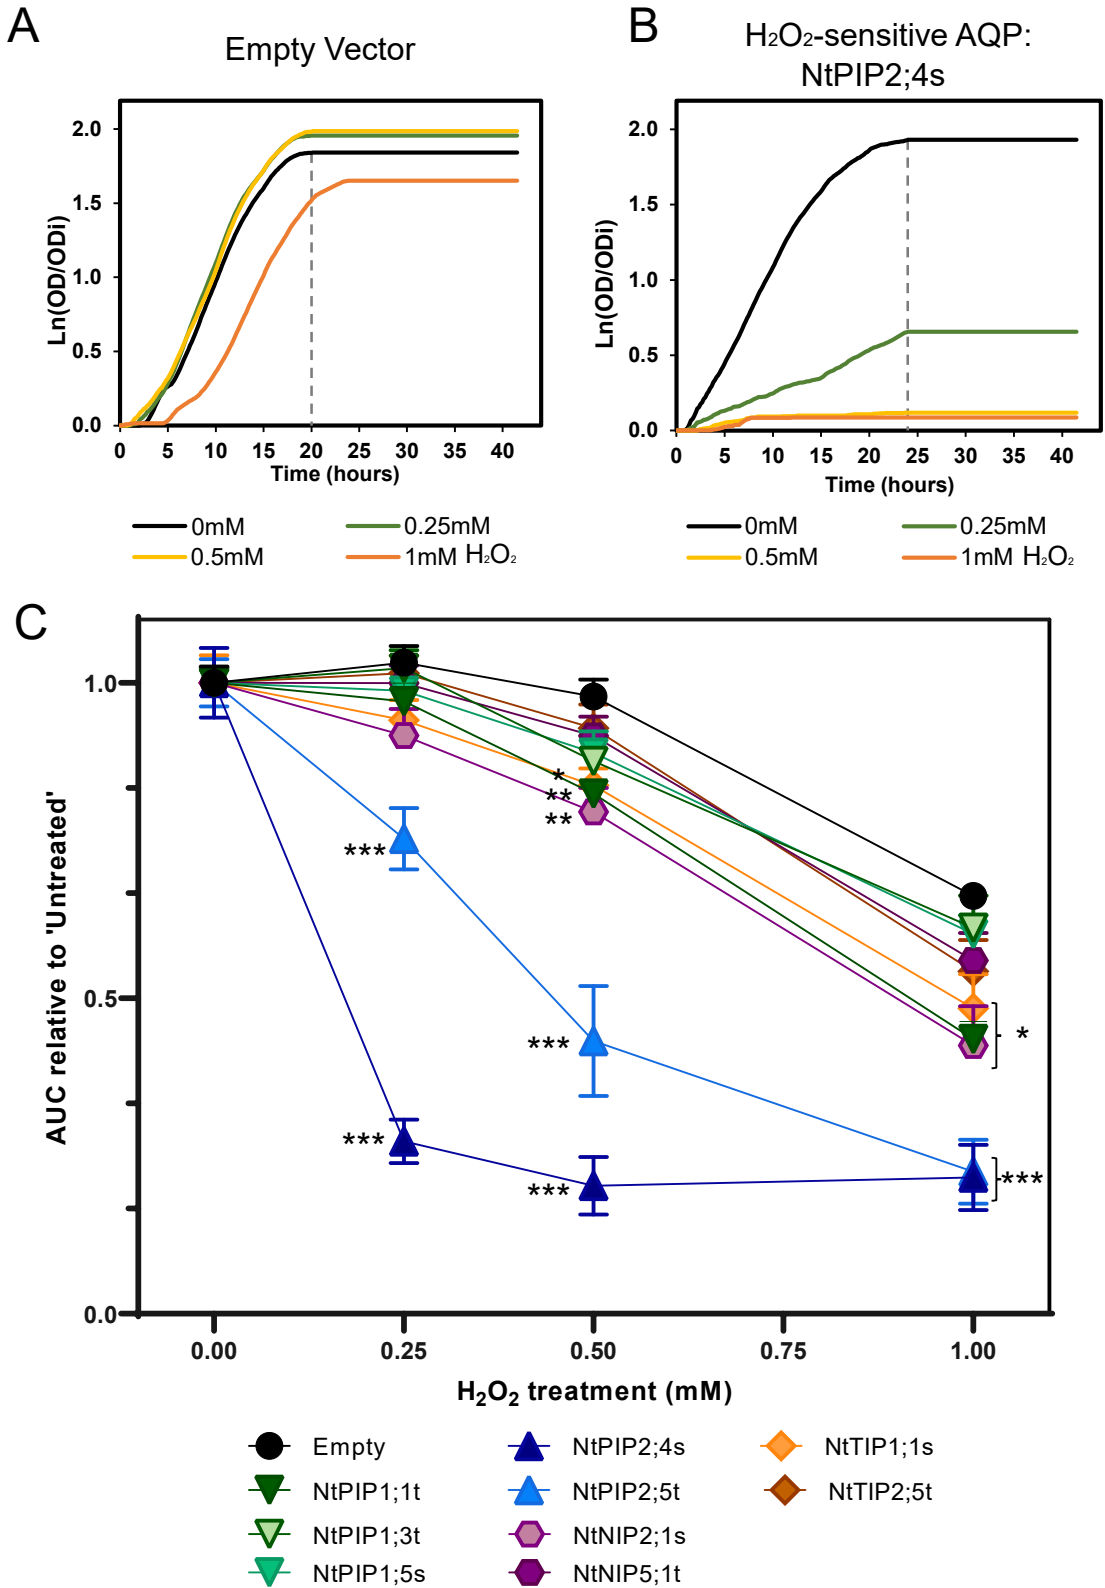

**Figure 4. NtAQP H<sub>2</sub>O<sub>2</sub> permeability assay.** Yeast growth curves, Ln(OD/OD<sub>i</sub>) vs. time, of *snk7* yeast expressing **A.** Empty vector control or **B.** an H<sub>2</sub>O<sub>2</sub>-sensitive AQP (NtPIP2;4s), exposed to 0.25mM, 0.5mM and 1mM H<sub>2</sub>O<sub>2</sub> treatments. Growth was assessed from the area under the curves (AUC) until the vertical dashed lines. **C.** Yeast culture growth relative to 'Untreated' control (AUC relative to untreated), for *snk7* yeast expressing an Empty vector or one the 9 NtAQPs. Asterisks denote One-way ANOVA with Fishers LSD test results comparing H<sub>2</sub>O<sub>2</sub>-treated yeast growth against Empty vector; "\*" p < 0.05, "\*\*\*" p < 0.001 and "\*\*\*\*" p < 0.0001. N=6, Error bars=SE.



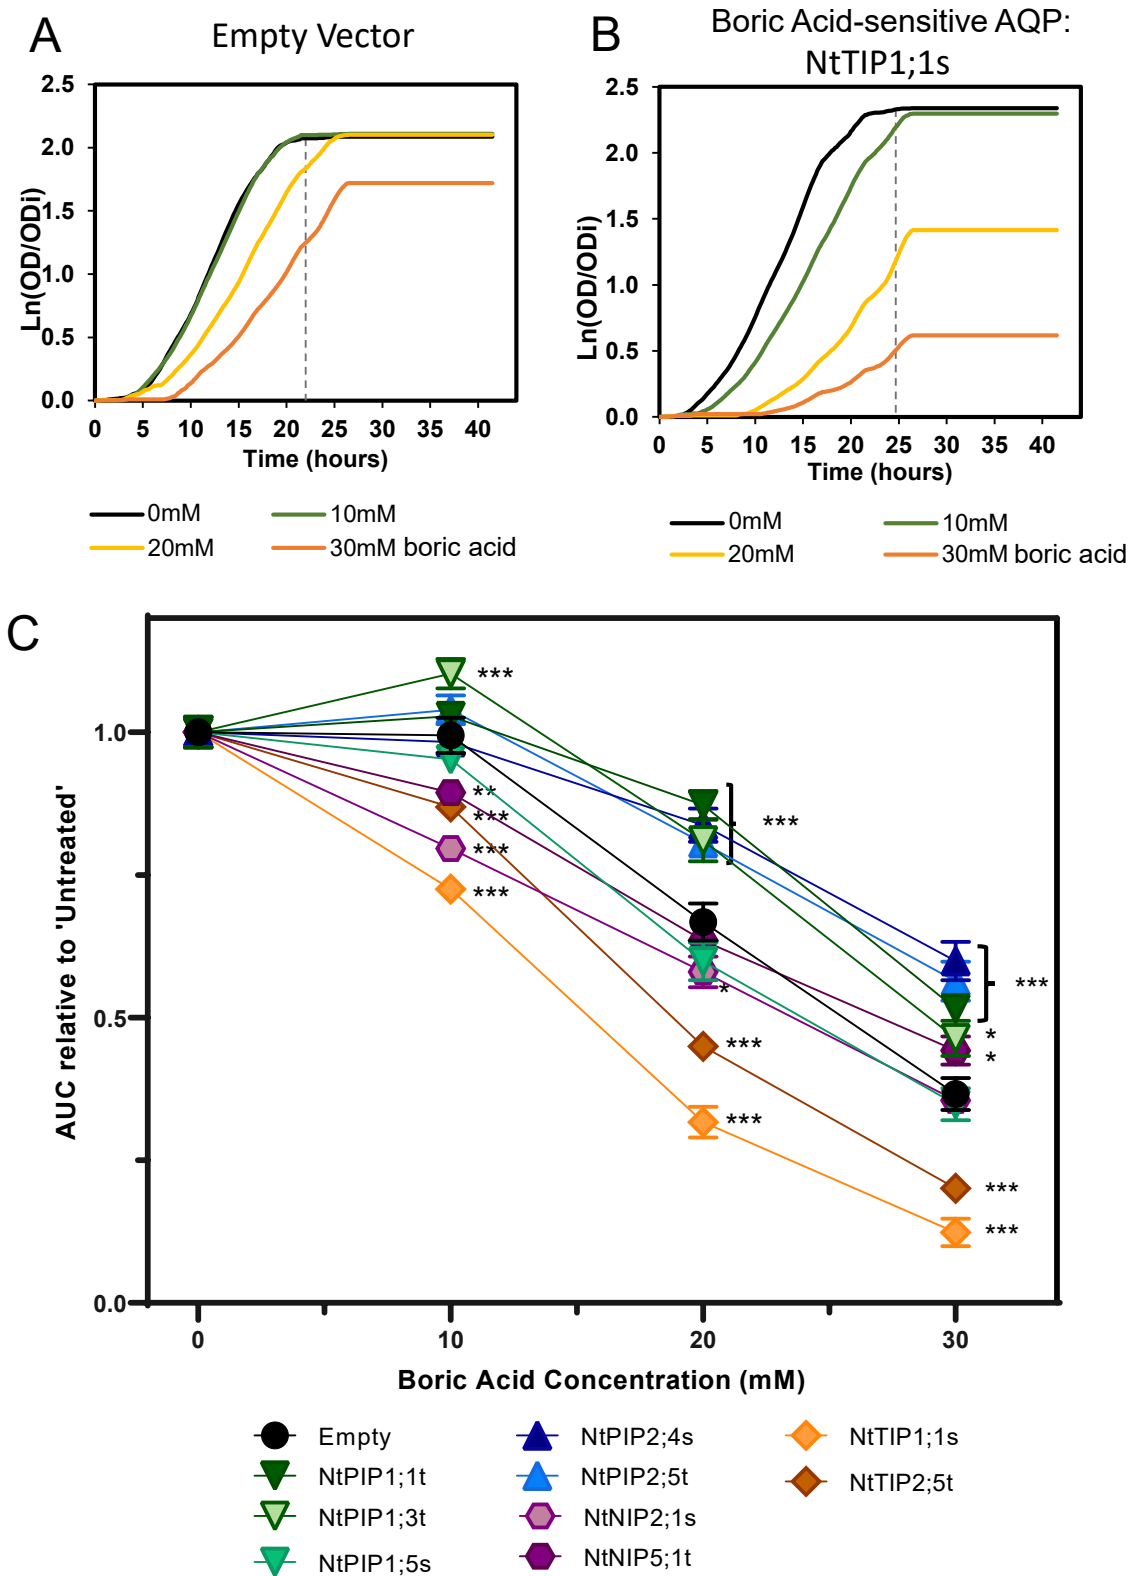

**Figure 5. Boric acid permeability assay for yeast expressing NtAQPs.** Yeast growth curves, Ln(OD/OD<sub>i</sub>) vs. time, of aqy1 aqy2 yeast expressing **A.** Empty vector control or **B.** a boric acid-sensitive AQP (NtTIP1;1s), exposed to 10mM, 20mM and 30mM boric acid treatments. Growth was assessed from the area under the curves (AUC) until the vertical dashed lines. **C.** Yeast culture growth relative to untreated control (AUC) of aqy1 aqy2 yeast expressing either an Empty vector or one of the 9 NtAQPs exposed to boric acid. Asterisks denote growth that was significantly different to Empty Vector using a One-Way ANOVA with Fishers LSD test; "\*" p<0.05, "\*\*\*" p<0.01 and "\*\*\*\*" p<0.001, N=6, Error bars=SE.

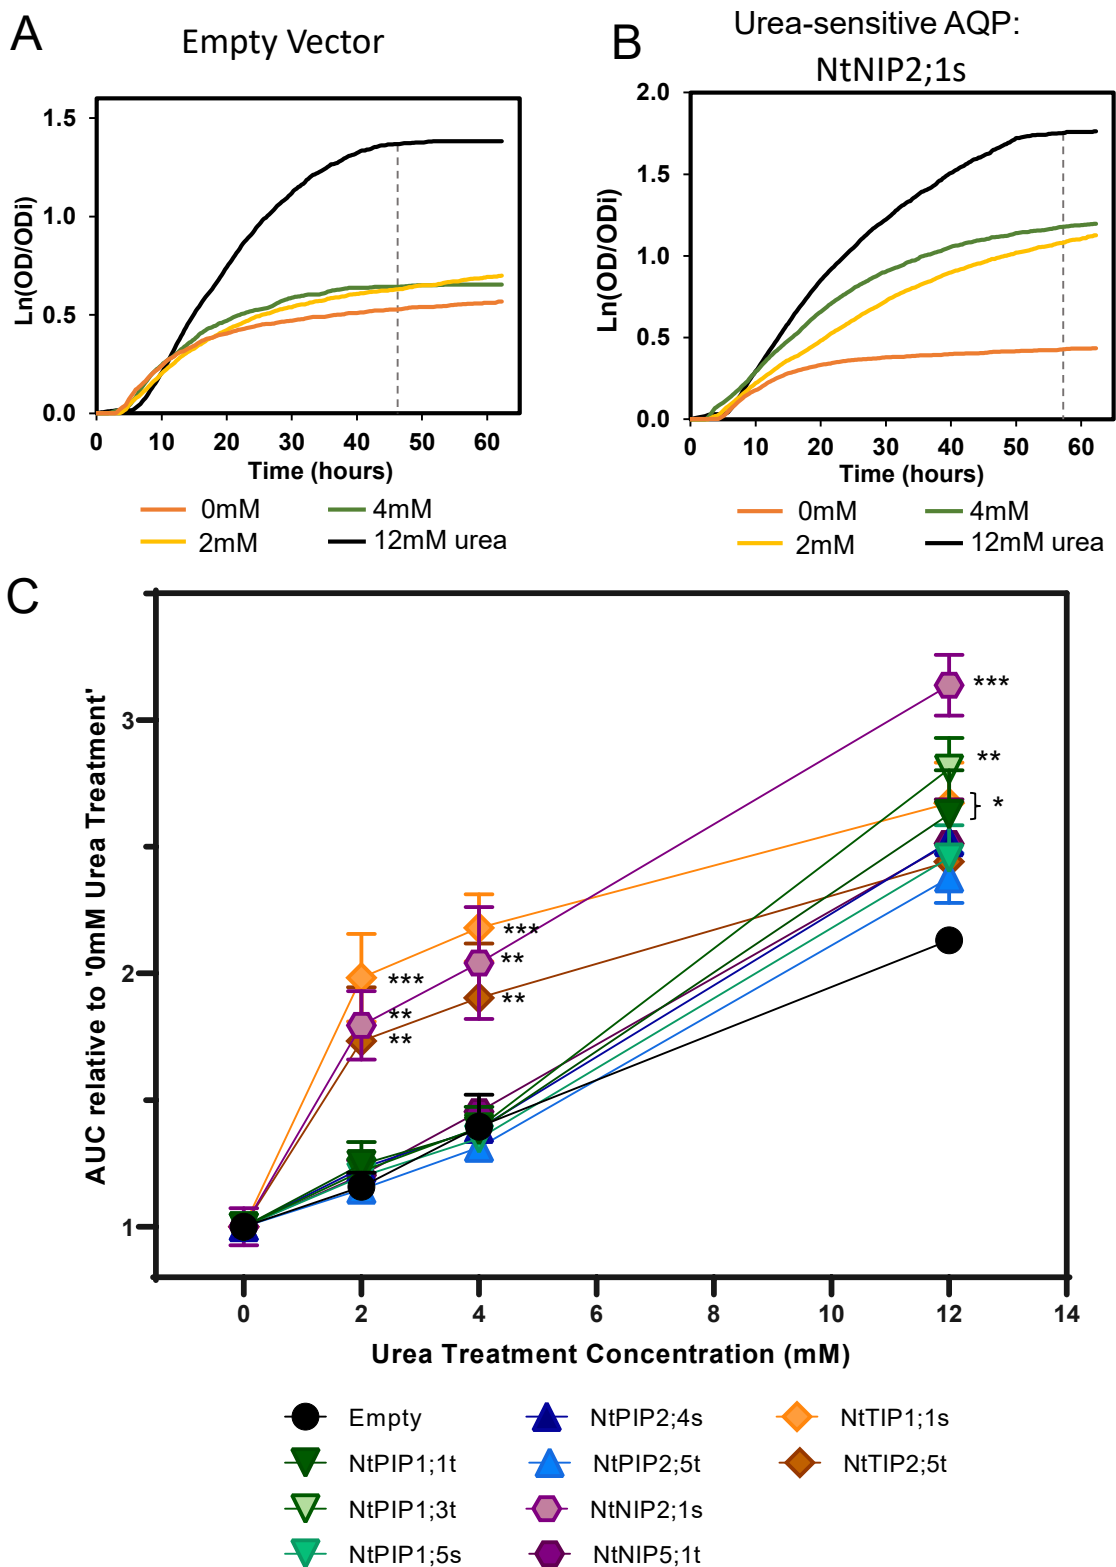

**Figure 6. Urea permeability assays for yeast expressing NtAQPs.** Yeast growth curves, Ln(OD/OD<sub>i</sub>) vs. time, of ynwvl yeast expressing **A.** Empty vector control or **B.** a urea-permeable AQP (NtNIP2;1s), exposed to 0mM, 2mM, 4mM or 12mM urea treatments. Growth was assessed from the area under the curves (AUC) until the vertical dashed lines. **C.** AUC relative to 0mM Urea treatment of ynwvl yeast expressing either an Empty vector or one of the 9 screened NtAQPs. Asterisks denote growth that was significantly greater than Empty vector using a One-way ANOVA with Fishers LSD test, "\*" p<0.05, "\*\*" p<0.01 and "\*\*\*" p<0.001. N=6, Error bars=SE.

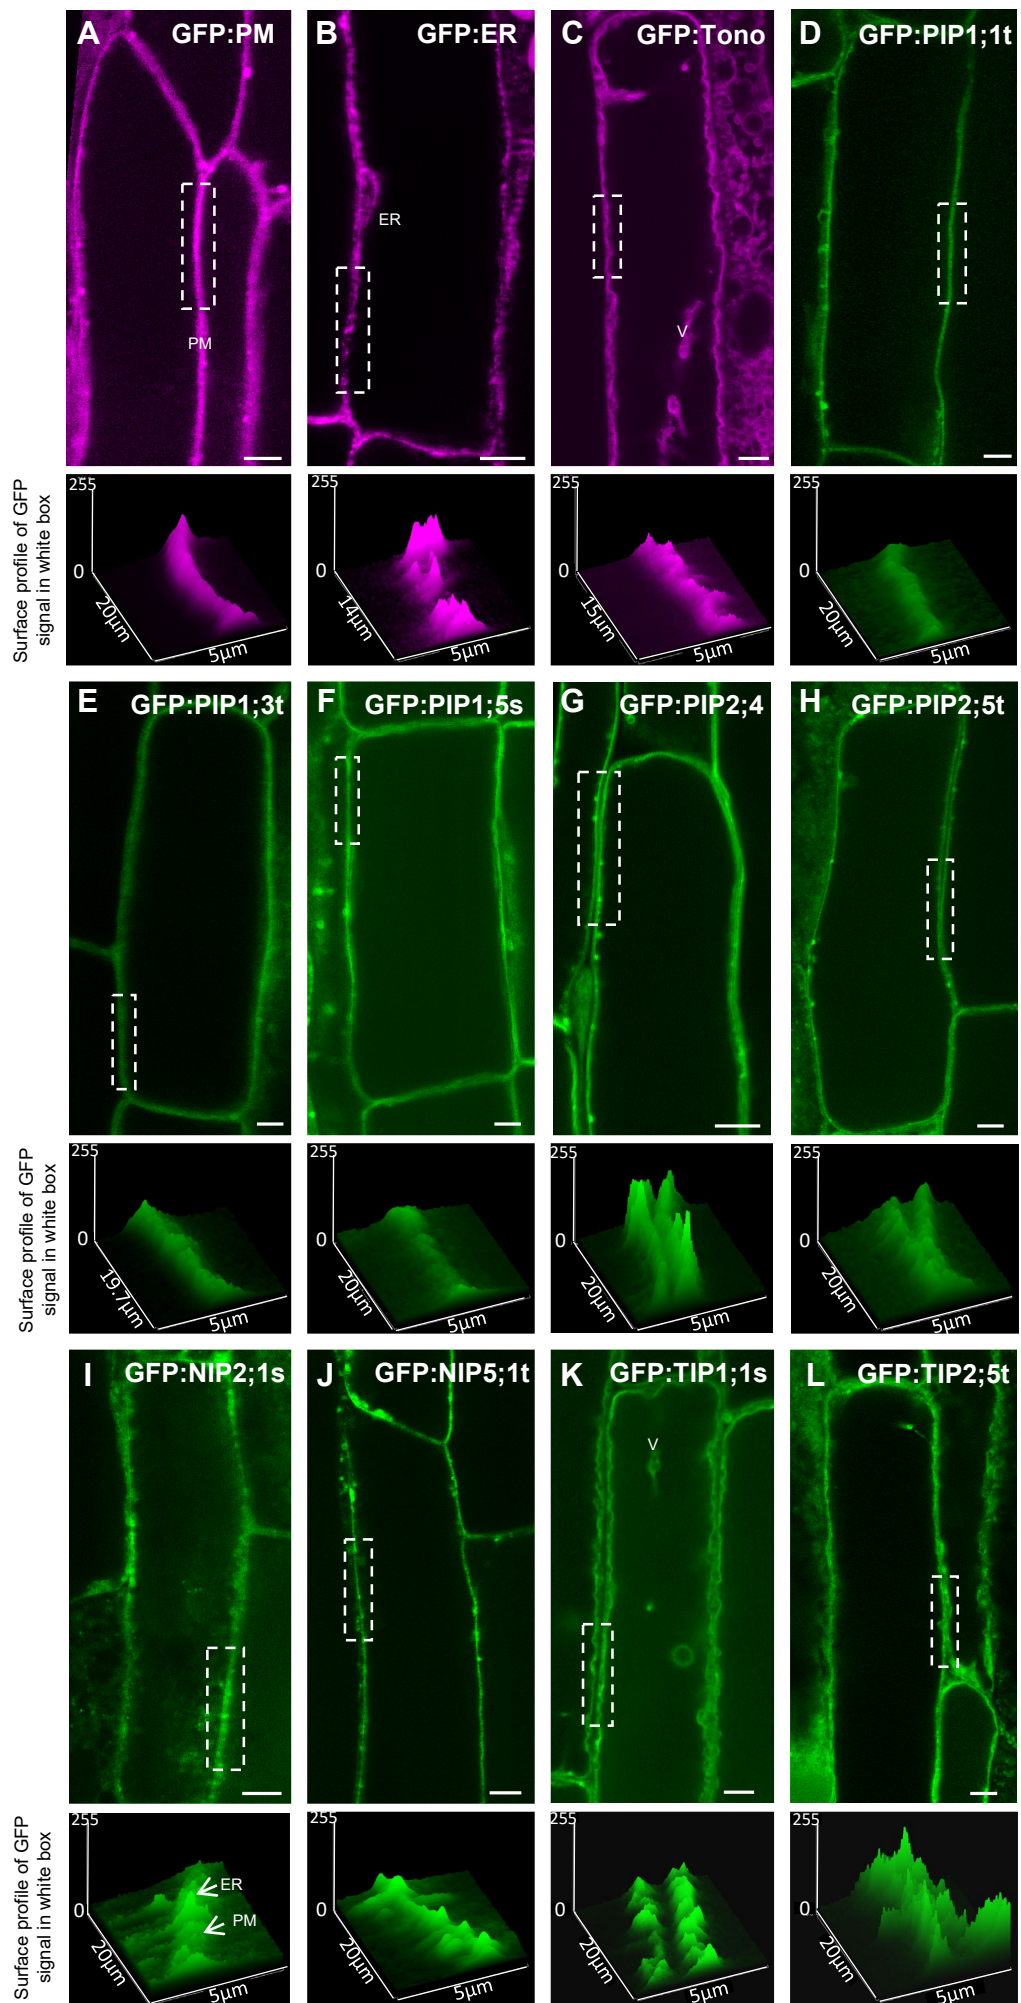

**Figure 7. In planta sub-cellular localisation of NtAQPs.** Confocal images of root cortical cells of transgenic 8-day old *Arabidopsis* seedlings. GFP marker lines; false coloured purple: **A.** plasma membrane, GFP:PM, **B.** endoplasmic reticulum, GFP:ER, **C.** tonoplast, GFP:tono. **GFP:NtAQP** lines: **D.** NtPIP1;1t, **E.** NtPIP1;3t, **F.** NtPIP1;5s, **G.** NtPIP2;4s, **H.** NtPIP2;5t, **I.** NtNIP2;1s, **J.** NtNIP5;1t, **K.** NtTIP1;1s and **L.** NtTIP2;5t. A region of the membrane (indicated by white dashed boxes, 5 $\mu$ m x 20 $\mu$ m dimension) is magnified in the panel below each confocal image to show surface profiles. Transvacuolar strands are denoted by V. White arrows highlight peak intensity discrepancies present in the NIPs assigned to AQP integration into the ER and PM. Scale bar 5 $\mu$ m.

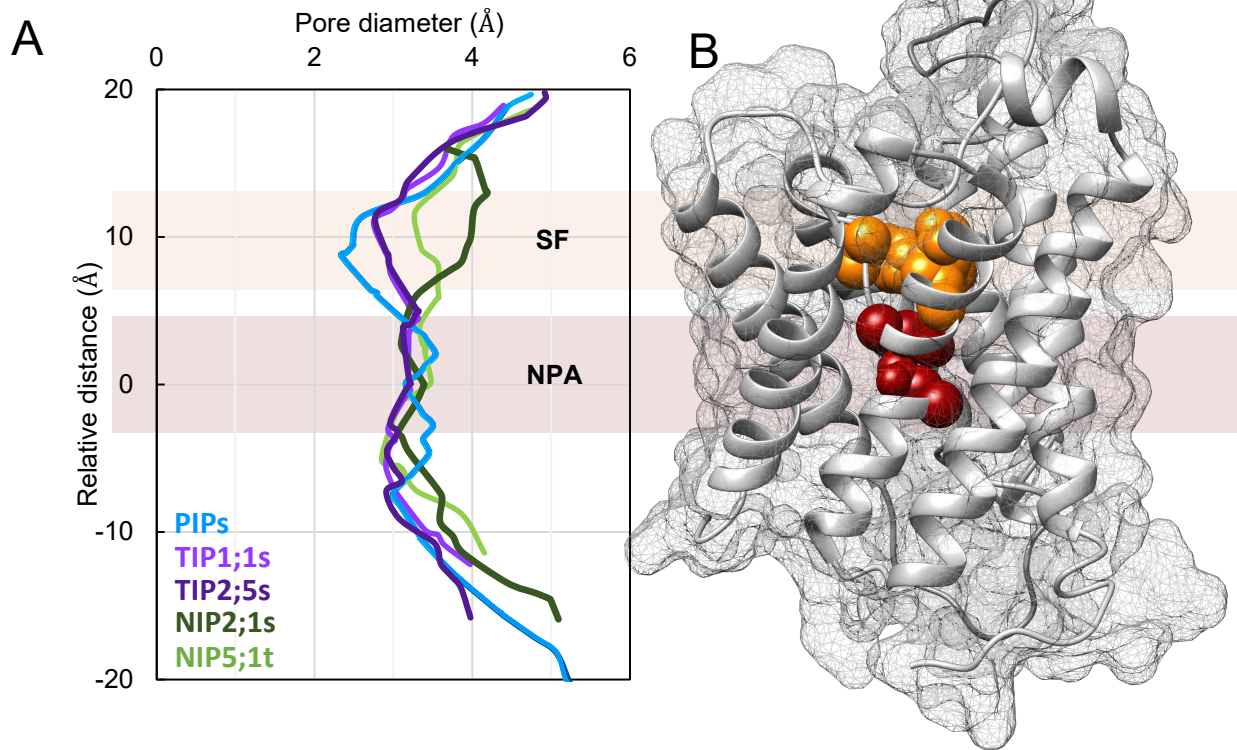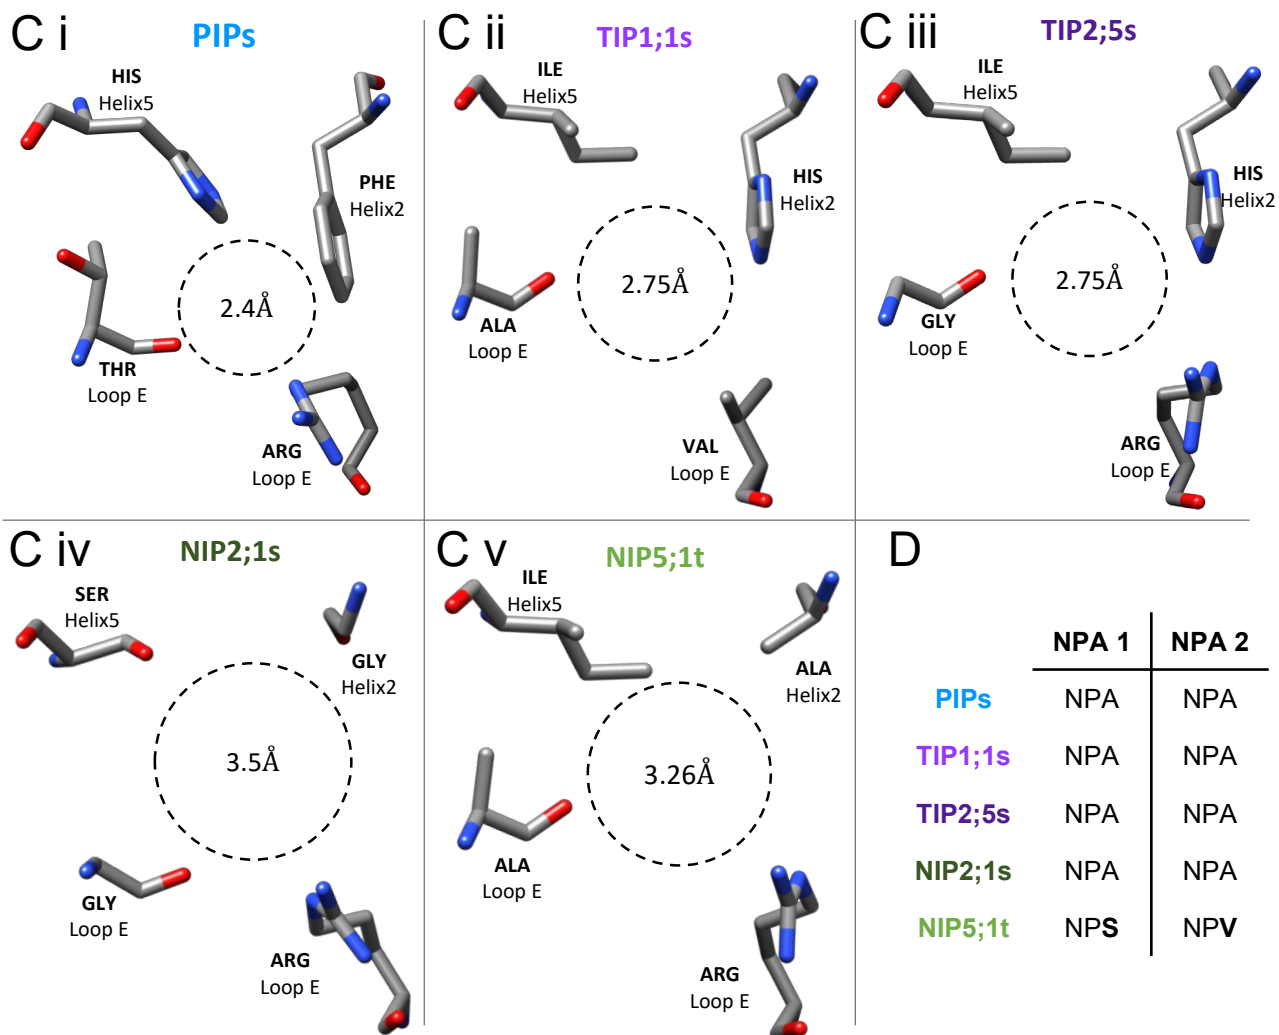

**Figure 8. Modelled NtAQP pore features.** **A.** Pore profiles of PIPs (PIP1;1 t, PIP1;3t, PIP1;5s, PIP2;4s, PIP2;5t; blue), TIP1;1s (light purple), TIP2;5t (dark purple), NIP2;1s (dark green) and NIP5;1t (light green). **B.** A 3D protein model highlighting the Selectivity Filter region (SF, orange residue in 3D Protein model) and NPA region (dark red residues in 3D protein model). **C.** Amino acid residues forming the selectivity filter and the diameter at its narrowest point, viewed perpendicular to the membrane plane from the extracellular side. **D.** NPA motifs: NPA 1 and NPA 2 composition of PIPs, TIP1;1s, TIP2;5t, NIP2;1s and NIP5;1t.

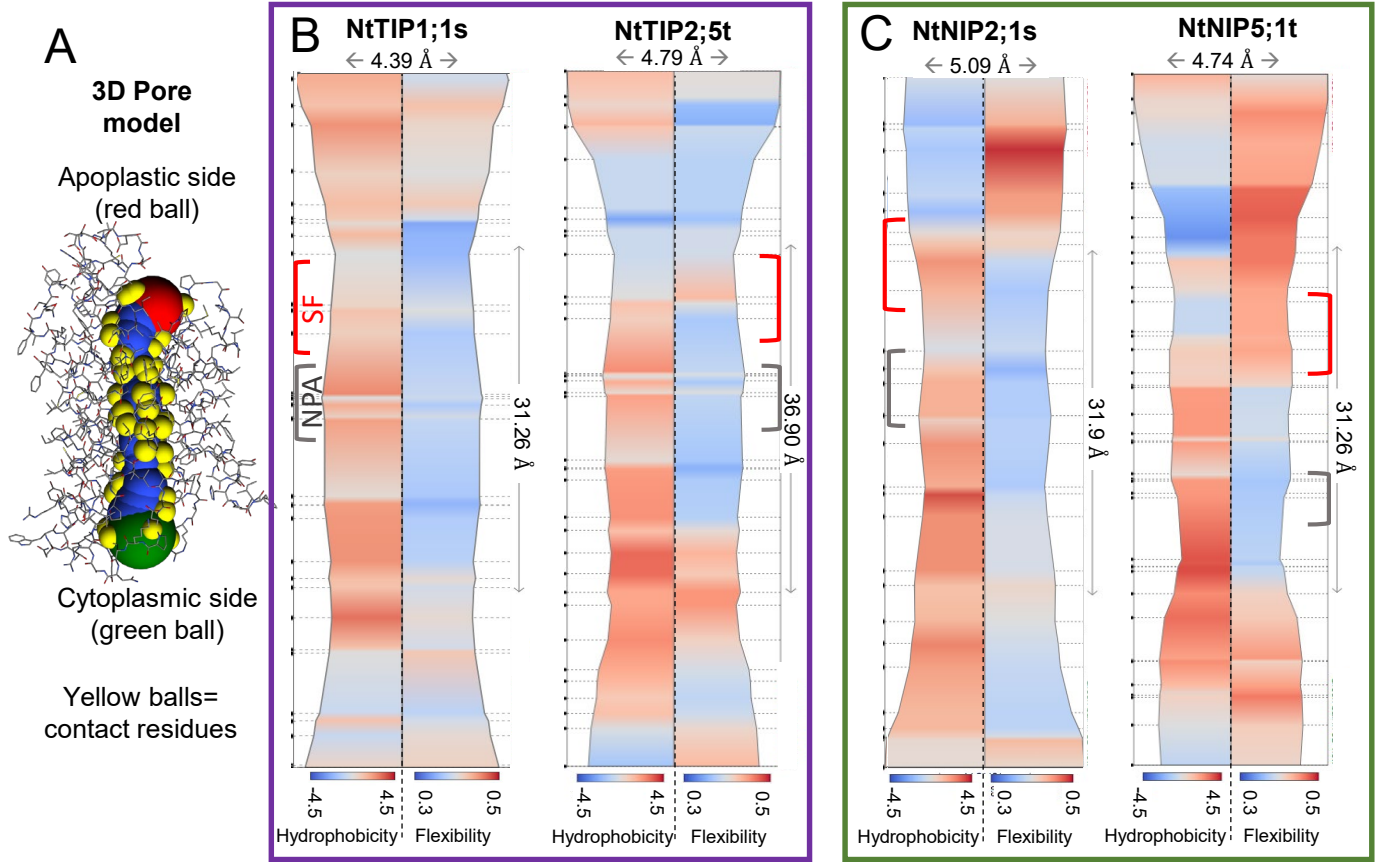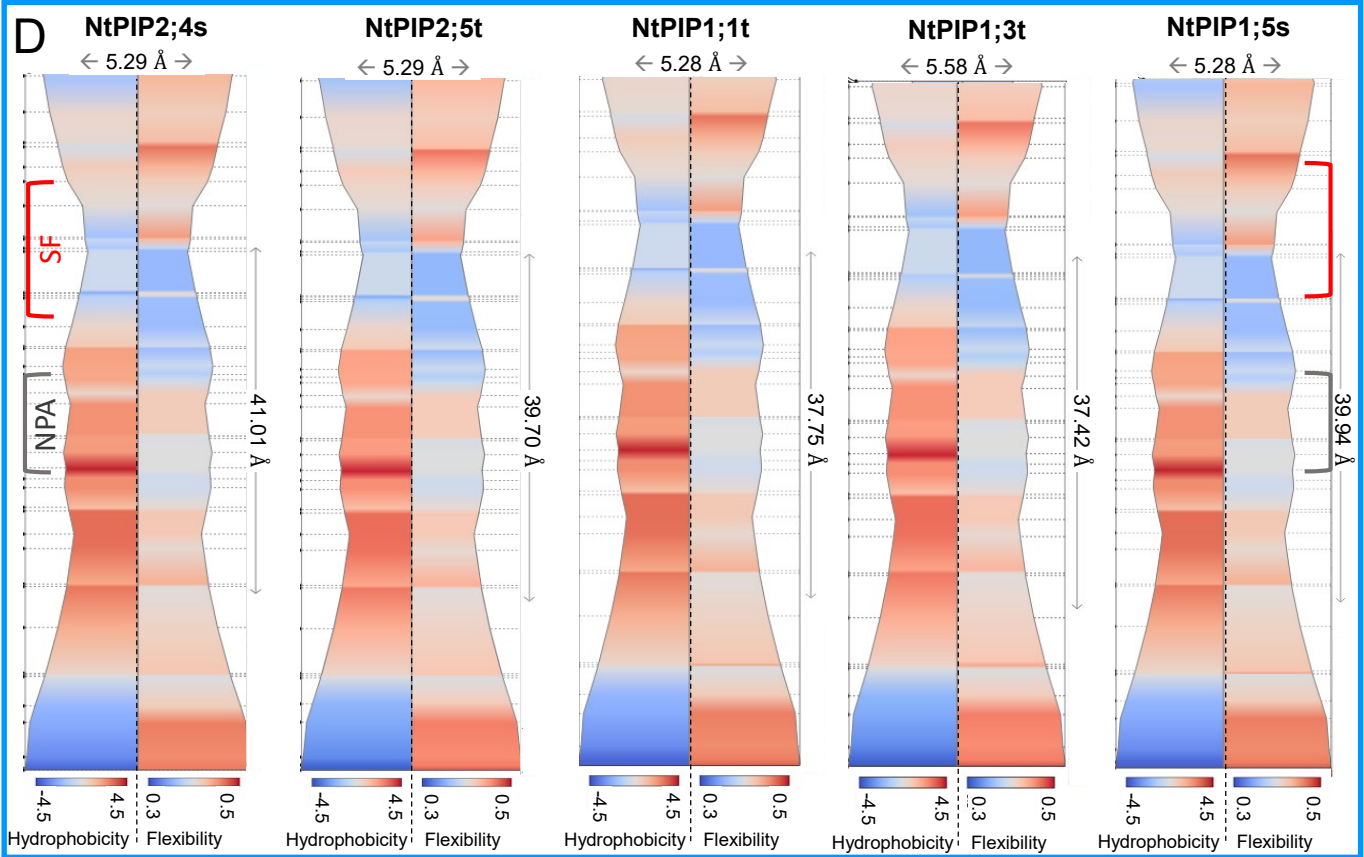

**Figure 9. Hydrophobicity and flexibility profiles of NtAQP pores.** **A.** 3D Pore model illustrates orientation of the pore profile with the apoplastic entrance (red ball, top), cytosolic entrance (green ball, bottom), residues contacting the pore (yellow balls) and the area inside the AQP pore (blue). Pore profile diameters from ChexVis software (note maximum diameter and pore length scales for each AQP), superimposed with Hydrophobicity (Left hand, Blue to Red indicating low to high hydrophobicity, respectively) and Flexibility (Right hand, Blue to Red indicating low to high flexibility, respectively): **B.** NtTIPs (NtTIP1;1s and NtTIP25t.) **C.** NtNIPs (NtNIP2;1s, NtNIP5;1t) and **D.** NtPIPs (NtPIP1;1t, NtPIP1;3t, NtPIP1;5s, NtPIP2;4s, NtPIP2;5t). Black dots to the left of each pore profile correspond to contact residue interactions for which hydrophobicity and flexibility outputs were generated. Red brackets indicate Selectivity Filter (SF) region and grey brackets indicate NPA region.
